# Supplementary material for: European and Asian contribution to the genetic diversity of mainland South American chickens
Source: R Soc Open Sci. 2020 Feb 5;7(2):191558. doi: 10.1098/rsos.191558 (PMC7062093; doi:10.1098/rsos.191558)
Supplement: Chicken mitochondrial Haplogroup assignment and source of sequences used in the study [file rsos191558supp1.xlsx]

## Sheet: Haplotype List
Haplotype No.	No. Sequences	Sequences belonging to haplotype	Haplogroup Assignment	Source of sequence	GenBank Accession Number of samples from this study
Hap_1	1	IND_EU847776	D	Kanginakudru et al. 2008
Hap_2	1	IND_EU847760	K	Kanginakudru et al. 2008
Hap_3	1	IND_EU847804	E	Kanginakudru et al. 2008
Hap_4	1	IND_EU847758	K	Kanginakudru et al. 2008
Hap_5	1	IND_EU847771	D	Kanginakudru et al. 2008
Hap_6	1	IND_EU847777	D	Kanginakudru et al. 2008
Hap_7	1	IND_EU847763	K	Kanginakudru et al. 2008
Hap_8	1	IND_EU847779	D	Kanginakudru et al. 2008
Hap_9	1	IND_EU847778	D	Kanginakudru et al. 2008
Hap_10	1	IND_EU847803	E	Kanginakudru et al. 2008
Hap_11	1	IND_EU847759	K	Kanginakudru et al. 2008
Hap_12	1	IND_EU847775	D	Kanginakudru et al. 2008
Hap_13	1	IND_EU847773	D	Kanginakudru et al. 2008
Hap_14	1	IND_EU847761	K	Kanginakudru et al. 2008
Hap_15	1	IND_EU847774	D	Kanginakudru et al. 2008
Hap_16	4	IND_GU261698	I	Miao et al. 2013
		IND_GU448374	I	Miao et al. 2013
		IND_GU448422	I	Miao et al. 2013
		IND_GU448466	I	Miao et al. 2013
Hap_17	1	IDN_CIS_KX642556	H	Herrera et al. 2017
Hap_18	1	IND_EU847793	D	Kanginakudru et al. 2008
Hap_19	1	IND_EU847807	E	Kanginakudru et al. 2008
Hap_20	1	IND_EU847806	E	Kanginakudru et al. 2008
Hap_21	10	VNM_HM462162	F	Berthouly-Salazar et al. 2010
		VNM_HM462142	F	Berthouly-Salazar et al. 2010
		CHN_AY392354_Yunnan	F	Liu et al. 2006
		LAO_GU447697	F	Miao et al. 2013
		LAO_GU448865	F	Miao et al. 2013
		VNM_HM462090	F	Berthouly-Salazar et al. 2010
		VNM_HM462110	F	Berthouly-Salazar et al. 2010
		VNM_HM462111	F	Berthouly-Salazar et al. 2010
		VNM_HM462150	F	Berthouly-Salazar et al. 2010
		VNM_HM462154	F	Berthouly-Salazar et al. 2010
Hap_22	2	CHN_AY392311_Yunnan	F	Liu et al. 2006
		CHN_AY392331_Yunnan	F	Liu et al. 2006
Hap_23	4	BGD_KC261010	F	Bhuiyan et al. 2013
		BGD_KC261012	F	Bhuiyan et al. 2013
		BGD_KC261016	F	Bhuiyan et al. 2013
		BGD_KC261019	F	Bhuiyan et al. 2013
Hap_24	1	CHN_AY392328_Yunnan	F	Liu et al. 2006
Hap_25	8	CHN_AY392312_Yunnan	F	Liu et al. 2006
		CHN_AY392318_Yunnan	F	Liu et al. 2006
		CHN_AY392321_Yunnan	F	Liu et al. 2006
		CHN_AY392327_Yunnan	F	Liu et al. 2006
		CHN_AY392329_Yunnan	F	Liu et al. 2006
		CHN_AY392330_Yunnan	F	Liu et al. 2006
		CHN_AY392338_Yunnan	F	Liu et al. 2006
		CHN_GU261688_Yunnan	F	Miao et al. 2013
Hap_26	1	THA_CHKMTS11	F	Fumihito 1996, GenBank
Hap_27	2	THA_AB009443	F	Miyake et al. 1997, GenBank
		THA_CHKMTS12	F	Fumihito 1996, GenBank
Hap_28	9	IND_GU448379	F	Miao et al. 2013
		IND_GU448390	F	Miao et al. 2013
		IND_GU448437	F	Miao et al. 2013
		IND_GU448395	F	Miao et al. 2013
		IND_GU448405	F	Miao et al. 2013
		IND_GU448408	F	Miao et al. 2013
		IND_GU448431	F	Miao et al. 2013
		IND_GU448419	F	Miao et al. 2013
		IND_GU448454	F	Miao et al. 2013
Hap_29	1	CHN_AF512157_Yunnan	F	Liu et al. 2006
Hap_30	3	CHN_AY392305_Yunnan	F	Liu et al. 2006
		CHN_AY392316_Yunnan	F	Liu et al. 2006
		CHN_GU261689_Yunnan	F	Miao et al. 2013
Hap_31	1	CHN_AY392173_Yunnan	F	Liu et al. 2006
Hap_32	1	CHN_AF512153_Yunnan	F	Liu et al. 2006
Hap_33	2	CHN_AF512057_Yunnan	F	Liu et al. 2006
		CHN_AF512058_Yunnan	F	Liu et al. 2006
Hap_34	2	MMR_GU447906	F	Miao et al. 2013
		MMR_GU447908	F	Miao et al. 2013
Hap_35	49	CHN_DQ648776_Yunnan	F	Tong et al., GenBank
		CHN_GU261717_Yunnan	F	Miao et al. 2013
		CHN_AF512108_Yunnan	F	Liu et al. 2006
		CHN_AF512248_Yunnan	F	Liu et al. 2006
		CHN_AF512285_Guangxi	F	Liu et al. 2006
		CHN_AY392192_Yunnan	F	Liu et al. 2006
		CHN_AY392193_Yunnan	F	Liu et al. 2006
		CHN_AY392205_Yunnan	F	Liu et al. 2006
		CHN_AY392206_Yunnan	F	Liu et al. 2006
		CHN_AY392207_Yunnan	F	Liu et al. 2006
		CHN_AY392208_Yunnan	F	Liu et al. 2006
		CHN_AY392211_Yunnan	F	Liu et al. 2006
		CHN_AY392212_Yunnan	F	Liu et al. 2006
		CHN_AY392214_Yunnan	F	Liu et al. 2006
		CHN_AY392218_Yunnan	F	Liu et al. 2006
		CHN_AY392221_Yunnan	F	Liu et al. 2006
		CHN_AY392228_Yunnan	F	Liu et al. 2006
		CHN_AY392245_Yunnan	F	Liu et al. 2006
		CHN_AY392249_Yunnan	F	Liu et al. 2006
		CHN_AY392250_Yunnan	F	Liu et al. 2006
		CHN_AY392253_Yunnan	F	Liu et al. 2006
		CHN_AY392257_Yunnan	F	Liu et al. 2006
		CHN_AY392278_Yunnan	F	Liu et al. 2006
		CHN_AY392294_Yunnan	F	Liu et al. 2006
		CHN_AY392317_Yunnan	F	Liu et al. 2006
		CHN_AY392319_Yunnan	F	Liu et al. 2006
		CHN_AY392320_Yunnan	F	Liu et al. 2006
		CHN_AY392322_Yunnan	F	Liu et al. 2006
		CHN_AY392345_Yunnan	F	Liu et al. 2006
		CHN_AY392359_Yunnan	F	Liu et al. 2006
		CHN_AY392369_Yunnan	F	Liu et al. 2006
		CHN_AY392370_Yunnan	F	Liu et al. 2006
		LAO_GU447701	F	Miao et al. 2013
		VNM_GU447918	F	Miao et al. 2013
		VNM_GU447919	F	Miao et al. 2013
		VNM_GU447921	F	Miao et al. 2013
		VNM_GU447936	F	Miao et al. 2013
		VNM_GU448057	F	Miao et al. 2013
		VNM_HM462083	F	Berthouly-Salazar et al. 2010
		VNM_HM462102	F	Berthouly-Salazar et al. 2010
		VNM_HM462109	F	Berthouly-Salazar et al. 2010
		VNM_HM462114	F	Berthouly-Salazar et al. 2010
		VNM_HM462120	F	Berthouly-Salazar et al. 2010
		VNM_HM462121	F	Berthouly-Salazar et al. 2010
		BGD_KC260980	F	Bhuiyan et al. 2013
		BGD_KC260981	F	Bhuiyan et al. 2013
		BGD_KC261001	F	Bhuiyan et al. 2013
		BGD_KC261004	F	Bhuiyan et al. 2013
		BGD_KC261007	F	Bhuiyan et al. 2013
Hap_36	1	VNM_HM462182	F	Berthouly-Salazar et al. 2010
Hap_37	1	MMR_AF512185	F	Liu et al. 2006
Hap_38	3	BGD_KC260991	F	Bhuiyan et al. 2013
		BGD_KC260992	F	Bhuiyan et al. 2013
		BGD_KC260993	F	Bhuiyan et al. 2013
Hap_39	2	CHN_GU261702_Yunnan	F	Miao et al. 2013
		MMR_GU448499	F	Miao et al. 2013
Hap_40	2	CHN_AY392309_Yunnan	F	Liu et al. 2006
		CHN_AY392334_Yunnan	F	Liu et al. 2006
Hap_41	3	CHN_AF512161_Yunnan	F	Liu et al. 2006
		MMR_GU261691	F	Miao et al. 2013
		MMR_GU447893	F	Miao et al. 2013
Hap_42	27	CHN_AY392314_Yunnan	F	Liu et al. 2006
		CHN_GU261711_Yunnan	F	Miao et al. 2013
		CHN_AF512163_Yunnan	F	Liu et al. 2006
		CHN_AY392213_Yunnan	F	Liu et al. 2006
		CHN_AY392230_Yunnan	F	Liu et al. 2006
		CHN_AY392262_Yunnan	F	Liu et al. 2006
		CHN_AY392264_Yunnan	F	Liu et al. 2006
		CHN_AY392267_Yunnan	F	Liu et al. 2006
		CHN_AY392273_Yunnan	F	Liu et al. 2006
		CHN_AY392275_Yunnan	F	Liu et al. 2006
		CHN_AY392277_Yunnan	F	Liu et al. 2006
		CHN_AY392281_Yunnan	F	Liu et al. 2006
		CHN_AY392286_Yunnan	F	Liu et al. 2006
		CHN_AY392287_Yunnan	F	Liu et al. 2006
		CHN_AY392288_Yunnan	F	Liu et al. 2006
		CHN_AY392297_Yunnan	F	Liu et al. 2006
		CHN_AY392313_Yunnan	F	Liu et al. 2006
		CHN_AY392337_Yunnan	F	Liu et al. 2006
		CHN_AY392339_Yunnan	F	Liu et al. 2006
		LAO_GU447728	F	Miao et al. 2013
		MMR_GU261703	F	Miao et al. 2013
		MMR_AF512186	F	Liu et al. 2006
		BGD_KC260987	F	Bhuiyan et al. 2013
		BGD_KC260988	F	Bhuiyan et al. 2013
		BGD_KC260990	F	Bhuiyan et al. 2013
		BGD_KC261008	F	Bhuiyan et al. 2013
		BGD_KC261018	F	Bhuiyan et al. 2013
Hap_43	1	BGD_KC260974	F	Bhuiyan et al. 2013
Hap_44	1	IND_EU847805	E	Kanginakudru et al. 2008
Hap_45	1	CHN_GU261706_Yunnan	D	Miao et al. 2013
Hap_46	3	CHN_AY392220_Yunnan	G	Liu et al. 2006
		CHN_AY392224_Yunnan	G	Liu et al. 2006
		CHN_AY392225_Yunnan	G	Liu et al. 2006
Hap_47	1	CHN_AY465996_Yunnan	G	Liu et al. 2003; GenBank
Hap_48	3	CHN_AY392346_Yunnan	G	Liu et al. 2006
		CHN_AY392348_Yunnan	G	Liu et al. 2006
		VNM_GU448062	G	Miao et al. 2013
Hap_49	1	VNM_HM462175	G	Berthouly-Salazar et al. 2010
Hap_50	2	CHN_AY392290_Yunnan	G	Liu et al. 2006
		CHN_GU261710_Yunnan	G	Miao et al. 2013
Hap_51	2	CHN_AY392215_Yunnan	G	Liu et al. 2006
		CHN_AY392216_Yunnan	G	Liu et al. 2006
Hap_52	2	CHN_AF512112_Yunnan	G	Liu et al. 2006
		CHN_AF512246_Yunnan	G	Liu et al. 2006
Hap_53	1	CHN_AY392239_Yunnan	G	Liu et al. 2006
Hap_54	3	CHN_AF512249_Yunnan	G	Liu et al. 2006
		CHN_AF512292_Yunnan	G	Liu et al. 2006
		CHN_GU261676_Yunnan	G	Miao et al. 2013
Hap_55	1	CHN_AY392260_Yunnan	G	Liu et al. 2006
Hap_56	6	CHN_GU261678_Henan	G	Miao et al. 2013
		CHN_AF512067_Sichuan	G	Liu et al. 2006
		CHN_AF512146_Hennan	G	Liu et al. 2006
		CHN_AY392283_Yunnan	G	Liu et al. 2006
		CHN_AY392285_Yunnan	G	Liu et al. 2006
		CHN_AY392295_Yunnan	G	Liu et al. 2006
Hap_57	1	CHN_AY392351_Yunnan	G	Liu et al. 2006
Hap_58	3	CHN_AY392251_Yunnan	G	Liu et al. 2006
		CHN_AY392252_Yunnan	G	Liu et al. 2006
		CHN_GU261690_Yunnan	G	Miao et al. 2013
Hap_59	1	CHN_AY392282_Yunnan	G	Liu et al. 2006
Hap_60	1	CHN_AY465997_Yunnan	G	Liu et al. 2003; GenBank
Hap_61	1	CHN_AY392335_Yunnan	G	Liu et al. 2006
Hap_62	1	CHN_AY392209_Yunnan	G	Liu et al. 2006
Hap_63	1	CHN_AY392237_Yunnan	G	Liu et al. 2006
Hap_64	2	CHN_AY392232_Yunnan	G	Liu et al. 2006
		CHN_AY392289_Yunnan	G	Liu et al. 2006
Hap_65	3	CHN_AY392292_Yunnan	G	Liu et al. 2006
		CHN_AY392296_Yunnan	G	Liu et al. 2006
		CHN_AY392303_Yunnan	G	Liu et al. 2006
Hap_66	1	CHN_AY392241_Yunnan	G	Liu et al. 2006
Hap_67	45	CHN_AY392263_Yunnan	G	Liu et al. 2006
		CHN_AY392270_Yunnan	G	Liu et al. 2006
		CHN_AY392271_Yunnan	G	Liu et al. 2006
		CHN_AY392274_Yunnan	G	Liu et al. 2006
		CHN_AY392276_Yunnan	G	Liu et al. 2006
		CHN_AY392279_Yunnan	G	Liu et al. 2006
		CHN_GU261719_Yunnan	G	Miao et al. 2013
		CHN_AF512288_Guangxi	G	Liu et al. 2006
		CHN_AF512291_Guangxi	G	Liu et al. 2006
		CHN_AF512325_Yunnan	G	Liu et al. 2006
		CHN_AF512327_Yunnan	G	Liu et al. 2006
		CHN_AY392172_Yunnan	G	Liu et al. 2006
		CHN_AY392194_Yunnan	G	Liu et al. 2006
		CHN_AY392196_Yunnan	G	Liu et al. 2006
		CHN_AY392197_Yunnan	G	Liu et al. 2006
		CHN_AY392199_Yunnan	G	Liu et al. 2006
		CHN_AY392200_Yunnan	G	Liu et al. 2006
		CHN_AY392201_Yunnan	G	Liu et al. 2006
		CHN_AY392210_Yunnan	G	Liu et al. 2006
		CHN_AY392222_Yunnan	G	Liu et al. 2006
		CHN_AY392226_Yunnan	G	Liu et al. 2006
		CHN_AY392231_Yunnan	G	Liu et al. 2006
		CHN_AY392234_Yunnan	G	Liu et al. 2006
		CHN_AY392246_Yunnan	G	Liu et al. 2006
		CHN_AY392255_Yunnan	G	Liu et al. 2006
		CHN_AY392265_Yunnan	G	Liu et al. 2006
		CHN_AY392266_Yunnan	G	Liu et al. 2006
		CHN_AY392268_Yunnan	G	Liu et al. 2006
		CHN_AY392272_Yunnan	G	Liu et al. 2006
		CHN_AY392280_Yunnan	G	Liu et al. 2006
		CHN_AY392284_Yunnan	G	Liu et al. 2006
		CHN_AY392293_Yunnan	G	Liu et al. 2006
		CHN_AY392342_Yunnan	G	Liu et al. 2006
		CHN_AY392352_Yunnan	G	Liu et al. 2006
		CHN_AY392353_Yunnan	G	Liu et al. 2006
		CHN_AY392355_Yunnan	G	Liu et al. 2006
		CHN_AY392357_Yunnan	G	Liu et al. 2006
		CHN_AY392360_Yunnan	G	Liu et al. 2006
		LAO_GU447702	G	Miao et al. 2013
		LAO_GU447726	G	Miao et al. 2013
		VNM_HM462112	G	Berthouly-Salazar et al. 2010
		VNM_HM462135	G	Berthouly-Salazar et al. 2010
		VNM_HM462144	G	Berthouly-Salazar et al. 2010
		VNM_HM462164	G	Berthouly-Salazar et al. 2010
		VNM_HM462181	G	Berthouly-Salazar et al. 2010
Hap_68	1	CHN_AF512324_Yunnan	G	Liu et al. 2006
Hap_69	1	COL111	E	This study	MN149809
Hap_70	5	IND_AY644967	E	Liu et al. 2006
		IND_AY644969	E	Liu et al. 2006
		IND_GU261708	E	Miao et al. 2013
		IND_GU447586	E	Miao et al. 2013
		IND_GU447588	E	Miao et al. 2013
Hap_71	6	IND_EU847809	E	Kanginakudru et al. 2008
		IND_EU847810	E	Kanginakudru et al. 2008
		BGD_KC260977	E	Bhuiyan et al. 2013
		IND_HQ857211	E	Miao et al. 2013
		IND_EU847808	E	Kanginakudru et al. 2008
		IND_GU448362	E	Miao et al. 2013
Hap_72	1	IND_GU448950	E	Miao et al. 2013
Hap_73	2	IND_GU448953	E	Miao et al. 2013
		IND_GU448955	E	Miao et al. 2013
Hap_74	1	BGD_KC260979	E	Bhuiyan et al. 2013
Hap_75	1	IND_GU448964	E	Miao et al. 2013
Hap_76	4	IND_GU448758	E	Miao et al. 2013
		IND_GU448770	E	Miao et al. 2013
		IND_GU448917	E	Miao et al. 2013
		IND_GU448969	E	Miao et al. 2013
Hap_77	5	BGD_KC261035	E	Bhuiyan et al. 2013
		IND_GU448441	E	Miao et al. 2013
		IND_GU448965	E	Miao et al. 2013
		IND_GU448967	E	Miao et al. 2013
		IND_HQ857212	E	Miao et al. 2013
Hap_78	1	IND_GU448766	E	Miao et al. 2013
Hap_79	2	IND_GU448378	E	Miao et al. 2013
		IND_HQ857210	E	Miao et al. 2013
Hap_80	4	IND_GU448952	E	Miao et al. 2013
		IND_EU847814	E	Kanginakudru et al. 2008
		IND_GU448363	E	Miao et al. 2013
		IND_GU448471	E	Miao et al. 2013
Hap_81	1	IND_GU448458	E	Miao et al. 2013
Hap_82	10	IND_GU448365	E	Miao et al. 2013
		IND_GU448420	E	Miao et al. 2013
		IND_GU448421	E	Miao et al. 2013
		IND_GU448423	E	Miao et al. 2013
		IND_GU448464	E	Miao et al. 2013
		IND_GU448415	E	Miao et al. 2013
		IND_GU448416	E	Miao et al. 2013
		IND_GU448436	E	Miao et al. 2013
		IND_GU448452	E	Miao et al. 2013
		IND_GU448427	E	Miao et al. 2013
Hap_83	2	BGD_KC261029	E	Bhuiyan et al. 2013
		BGD_KC261036	E	Bhuiyan et al. 2013
Hap_84	3	BGD_KC261044	E	Bhuiyan et al. 2013
		BGD_KC261055	E	Bhuiyan et al. 2013
		BGD_KC261056	E	Bhuiyan et al. 2013
Hap_85	26	COL34	E	This study	MN149753
		COL55	E	This study	MN149773
		COL57	E	This study	MN149775
		COL70	E	This study	MN149787
		COL74	E	This study	MN149791
		COL126	E	This study	MN149816
		COL142	E	This study	MN149827
		CHL_KU508856	E	Luzuriaga-Neira 2017
		CHL_KU508860	E	Luzuriaga-Neira 2017
		ECU_KU5088_15	E	Luzuriaga-Neira 2017
		ECU_KU5088_16	E	Luzuriaga-Neira 2017
		ECU_KU5088_23	E	Luzuriaga-Neira 2017
		ECU_KU5088_24	E	Luzuriaga-Neira 2017
		ECU_KU5088_27	E	Luzuriaga-Neira 2017
		ECU_KU5089	E	Luzuriaga-Neira 2017
		ECU_KU5089_18	E	Luzuriaga-Neira 2017
		ECU_KU5089_20	E	Luzuriaga-Neira 2017
		ECU_KU5089_23	E	Luzuriaga-Neira 2017
		ECU_KU5089_24	E	Luzuriaga-Neira 2017
		ECU_KU5089_30	E	Luzuriaga-Neira 2017
		ECU_KU5089_32	E	Luzuriaga-Neira 2017
		ECU_KU5089_33	E	Luzuriaga-Neira 2017
		ECU_KU5089_35	E	Luzuriaga-Neira 2017
		ECU_KU5089_38	E	Luzuriaga-Neira 2017
		ECU_KU5089_46	E	Luzuriaga-Neira 2017
		BOL_KX513784	E	Luzuriaga-Neira 2017
Hap_86	1	COL23	E	This study	MN149742
Hap_87	10	CHN_GU261686_Henan	E	Miao et al. 2013
		AZE_AY704696	E	Liu et al. 2006
		COL44	E	This study	MN149763
		ECU_KU5088_5	E	Luzuriaga-Neira 2017
		ECU_KU5088_11	E	Luzuriaga-Neira 2017
		PER_KU508962	E	Luzuriaga-Neira 2017
		BGD_KC261026	E	Bhuiyan et al. 2013
		IND_GU448404	E	Miao et al. 2013
		IND_GU448483	E	Miao et al. 2013
		IND_GU448740	E	Miao et al. 2013
Hap_88	1	IND_GU448450	E	Miao et al. 2013
Hap_89	3	IND_GU448391	E	Miao et al. 2013
		IND_GU448469	E	Miao et al. 2013
		IND_GU448481	E	Miao et al. 2013
Hap_90	1	IND_GU447585	E	Miao et al. 2013
Hap_91	2	IND_EU847811	E	Kanginakudru et al. 2008
		IND_EU847812	E	Kanginakudru et al. 2008
Hap_92	1	BGD_KC261060	E	Bhuiyan et al. 2013
Hap_93	48	EUR_AY704708	E	Liu et al. 2006
		IND_EU847815	E	Kanginakudru et al. 2008
		IND_AY704708	E	Liu et al. 2006
		BGD_KC260973	E	Bhuiyan et al. 2013
		BGD_KC260989	E	Bhuiyan et al. 2013
		BGD_KC260997	E	Bhuiyan et al. 2013
		BGD_KC261003	E	Bhuiyan et al. 2013
		BGD_KC261005	E	Bhuiyan et al. 2013
		BGD_KC261006	E	Bhuiyan et al. 2013
		BGD_KC261030	E	Bhuiyan et al. 2013
		BGD_KC261031	E	Bhuiyan et al. 2013
		BGD_KC261046	E	Bhuiyan et al. 2013
		BGD_KC261047	E	Bhuiyan et al. 2013
		BGD_KC261048	E	Bhuiyan et al. 2013
		BGD_KC261049	E	Bhuiyan et al. 2013
		BGD_KC261052	E	Bhuiyan et al. 2013
		BGD_KC261053	E	Bhuiyan et al. 2013
		BGD_KC261054	E	Bhuiyan et al. 2013
		BGD_KC261064	E	Bhuiyan et al. 2013
		IND_HQ857209	E	Miao et al. 2013
		IND_EU847813	E	Kanginakudru et al. 2008
		IND_GU448358	E	Miao et al. 2013
		IND_GU448359	E	Miao et al. 2013
		IND_GU448386	E	Miao et al. 2013
		IND_GU448388	E	Miao et al. 2013
		IND_GU448394	E	Miao et al. 2013
		IND_GU448473	E	Miao et al. 2013
		IND_GU448367	E	Miao et al. 2013
		IND_GU448370	E	Miao et al. 2013
		IND_GU448960	E	Miao et al. 2013
		IND_GU448371	E	Miao et al. 2013
		IND_GU448403	E	Miao et al. 2013
		IND_GU448426	E	Miao et al. 2013
		IND_GU448376	E	Miao et al. 2013
		IND_GU448383	E	Miao et al. 2013
		IND_GU448384	E	Miao et al. 2013
		IND_GU448398	E	Miao et al. 2013
		IND_GU448479	E	Miao et al. 2013
		IND_GU448486	E	Miao et al. 2013
		IND_GU448962	E	Miao et al. 2013
		IND_GU448407	E	Miao et al. 2013
		IND_GU448442	E	Miao et al. 2013
		IND_GU448445	E	Miao et al. 2013
		IND_GU448446	E	Miao et al. 2013
		IND_GU448477	E	Miao et al. 2013
		IND_GU448743	E	Miao et al. 2013
		IND_GU448741	E	Miao et al. 2013
		IND_GU448387	E	Miao et al. 2013
Hap_94	1	PER_KU508958	E	Luzuriaga-Neira 2017
Hap_95	17	ECU_KU5089_50	E	Luzuriaga-Neira 2017
		PER_KU508953	E	Luzuriaga-Neira 2017
		COL40	E	This study	MN149759
		EUR_AY704712	E	Liu et al. 2006
		COL65	E	This study	MN149782
		COL73	E	This study	MN149790
		COL83	E	This study	MN149800
		COL138	E	This study	MN149823
		PER_D05	E	This study	MN149855
		BOL_KX513779	E	Luzuriaga-Neira 2017
		ECU_KU5089_5	E	Luzuriaga-Neira 2017
		ECU_KU5089_21	E	Luzuriaga-Neira 2017
		PER_KU508955	E	Luzuriaga-Neira 2017
		PER_KU508957	E	Luzuriaga-Neira 2017
		PER_KU508964	E	Luzuriaga-Neira 2017
		PER_KU508970	E	Luzuriaga-Neira 2017
		IND_AY704712	E	Liu et al. 2006
Hap_96	1	PHL_MDR_KX643026	E	Herrera et al. 2017
Hap_97	1	PHL_SAM_KX643114	E	Herrera et al. 2017
Hap_98	4	ECU_KU5088_10	E	Luzuriaga-Neira 2017
		ECU_KU5088_25	E	Luzuriaga-Neira 2017
		ECU_KU5088_30	E	Luzuriaga-Neira 2017
		IND_GU448411	E	Miao et al. 2013
Hap_99	3	IND_GU448364	E	Miao et al. 2013
		IND_GU448444	E	Miao et al. 2013
		IND_GU448485	E	Miao et al. 2013
Hap_100	1	IND_GU448369	E	Miao et al. 2013
Hap_101	29	CHN_AY392336_Yunnan	E	Liu et al. 2006
		EUR_AY704691	E	Liu et al. 2006
		IBE_KU527566	E	Luzuriaga-Neira 2017
		IBE_KU527571	E	Luzuriaga-Neira 2017
		IBE_KU527581	E	Luzuriaga-Neira 2017
		IBE_KU527588	E	Luzuriaga-Neira 2017
		IBE_KU527592	E	Luzuriaga-Neira 2017
		IBE_KU527593	E	Luzuriaga-Neira 2017
		IBE_KU527602	E	Luzuriaga-Neira 2017
		IBE_KU527604	E	Luzuriaga-Neira 2017
		IBE_KU527611	E	Luzuriaga-Neira 2017
		IBE_KU527624	E	Luzuriaga-Neira 2017
		IBE_KU527628	E	Luzuriaga-Neira 2017
		IBE_KU527632	E	Luzuriaga-Neira 2017
		IBE_KU527633	E	Luzuriaga-Neira 2017
		IBE_KU527634	E	Luzuriaga-Neira 2017
		ECU_KU5089_22	E	Luzuriaga-Neira 2017
		PER_KU508966	E	Luzuriaga-Neira 2017
		PER_KU508967	E	Luzuriaga-Neira 2017
		PER_KU508968	E	Luzuriaga-Neira 2017
		PER_D03	E	This study	MN149853
		COL53	E	This study	MN149771
		COL77	E	This study	MN149794
		COL166	E	This study	MN149848
		BRA_KF800721	E	Herkenhoff et al., GenBank
		BRA_KF800726	E	Herkenhoff et al., GenBank
		ECU_KU5089_2	E	Luzuriaga-Neira 2017
		IDN_CIA_KX642584	E	Herrera et al. 2017
		LAO_AP003319	E	Nishibori et al. 2005
Hap_102	1	KOR_DQ629873	E	Lee et al. 2007
Hap_103	1	KOR_DQ629867	E	Lee et al. 2007
Hap_104	1	PHL_SAM_KX643115	E	Herrera et al. 2017
Hap_105	1	IND_GU448948	E	Miao et al. 2013
Hap_106	87	KOR_DQ629878	E	Lee et al. 2007
		KOR_DQ629872	E	Lee et al. 2007
		KOR_DQ629874	E	Lee et al. 2007
		KOR_DQ629880	E	Lee et al. 2007
		KOR_DQ629883	E	Lee et al. 2007
		KOR_DQ629871	E	Lee et al. 2007
		KOR_DQ629887	E	Lee et al. 2007
		KOR_DQ629869	E	Lee et al. 2007
		KOR_DQ629890	E	Lee et al. 2007
		CHN_GU261713_Yunnan	E	Miao et al. 2013
		CHN_AF128315_Zhejiang	E	Fu et al. 1999; GenBank
		CHN_AF128316_Zhejiang	E	Fu et al. 1999; GenBank
		CHN_AF512107_Sichuan	E	Liu et al. 2006
		CHN_AF512118_Guizhou	E	Liu et al. 2006
		CHN_AF512132_Guizhou	E	Liu et al. 2006
		CHN_AF512262_Sichuan	E	Liu et al. 2006
		CHN_AF512337_Sichuan	E	Liu et al. 2006
		CHN_AY392227_Yunnan	E	Liu et al. 2006
		CHN_AY392310_Yunnan	E	Liu et al. 2006
		CHN_AY465992_Jiangxi	E	Liu et al. 2003; GenBank
		EUR_AY704692	E	Liu et al. 2006
		EUR_AY704695	E	Liu et al. 2006
		IBE_KU527564	E	Luzuriaga-Neira 2017
		IBE_KU527565	E	Luzuriaga-Neira 2017
		IBE_KU527567	E	Luzuriaga-Neira 2017
		IBE_KU527573	E	Luzuriaga-Neira 2017
		IBE_KU527577	E	Luzuriaga-Neira 2017
		IBE_KU527582	E	Luzuriaga-Neira 2017
		IBE_KU527583	E	Luzuriaga-Neira 2017
		IBE_KU527584	E	Luzuriaga-Neira 2017
		IBE_KU527587	E	Luzuriaga-Neira 2017
		IBE_KU527589	E	Luzuriaga-Neira 2017
		IBE_KU527590	E	Luzuriaga-Neira 2017
		IBE_KU527591	E	Luzuriaga-Neira 2017
		IBE_KU527594	E	Luzuriaga-Neira 2017
		IBE_KU527595	E	Luzuriaga-Neira 2017
		IBE_KU527598	E	Luzuriaga-Neira 2017
		IBE_KU527599	E	Luzuriaga-Neira 2017
		IBE_KU527601	E	Luzuriaga-Neira 2017
		IBE_KU527607	E	Luzuriaga-Neira 2017
		IBE_KU527610	E	Luzuriaga-Neira 2017
		IBE_KU527614	E	Luzuriaga-Neira 2017
		IBE_KU527615	E	Luzuriaga-Neira 2017
		IBE_KU527617	E	Luzuriaga-Neira 2017
		IBE_KU527619	E	Luzuriaga-Neira 2017
		IBE_KU527621	E	Luzuriaga-Neira 2017
		IBE_KU527623	E	Luzuriaga-Neira 2017
		IBE_KU527627	E	Luzuriaga-Neira 2017
		IBE_KU527631	E	Luzuriaga-Neira 2017
		PER_D12	E	This study	MN149862
		CHL_KU508831	E	Luzuriaga-Neira 2017
		ECU_KU5088_9	E	Luzuriaga-Neira 2017
		ECU_KU5088_28	E	Luzuriaga-Neira 2017
		ECU_KU5089_4	E	Luzuriaga-Neira 2017
		ECU_KU5089_6	E	Luzuriaga-Neira 2017
		PER_KU508961	E	Luzuriaga-Neira 2017
		BRA_KF800719	E	Herkenhoff et al., GenBank
		BRA_KF800729	E	Herkenhoff et al., GenBank
		CHL_ARA_B08	E	This study	MN149709
		CHL_EF190849	E	Gongora et al. 2008
		CHL_EF190852	E	Gongora et al. 2008
		BRA_7pm1	E	This study	MN149637
		BRA_7pm2	E	This study	MN149638
		BRA_Aof3	E	This study	MN149641
		BRA_Aof4	E	This study	MN149642
		BRA_Aom5	E	This study	MN149645
		BRA_Aom7	E	This study	MN149646
		BRA_Aom10	E	This study	MN149647
		BRA_Inhaf1	E	This study	MN149648
		BRA_Inhaf2	E	This study	MN149649
		BRA_Inham2	E	This study	MN149653
		BRA_Jof10	E	This study	MN149659
		BRA_Jom3	E	This study	MN149662
		CHL_151PF	E	This study	MN149664
		CHL_154PF	E	This study	MN149667
		CHL_155PF	E	This study	MN149668
		CHL_156PF	E	This study	MN149669
		CHL_200PF	E	This study	MN149670
		COL69	E	This study	MN149786
		COL103	E	This study	MN149805
		COL168	E	This study	MN149850
		IDN_KDU_KX642819	E	Herrera et al. 2017
		IDN_SBW_KX643176	E	Herrera et al. 2017
		PHL_IFU_KX642691	E	Herrera et al. 2017
		VNM_GU447925	E	Miao et al. 2013
		VNM_GU448239	E	Miao et al. 2013
		IND_GU448966	E	Miao et al. 2013
Hap_107	485	COL_KX513777	E	Luzuriaga-Neira 2017
		COL_KX513796	E	Luzuriaga-Neira 2017
		ECU_KU5089_39	E	Luzuriaga-Neira 2017
		IND_GU448453	E	Miao et al. 2013
		CHN_AF512301_Hunan	E	Liu et al. 2006
		CHL_KU508837	E	Luzuriaga-Neira 2017
		VNM_GU447931	E	Miao et al. 2013
		CHN_AF128318_Zhejiang	E	Fu et al. 1999; GenBank
		TKM_AY704728	E	Liu et al. 2006
		ECU_KU5089_44	E	Luzuriaga-Neira 2017
		CHL_832ARA	E	This study	MN149695
		COL33	E	This study	MN149752
		COL128	E	This study	MN149818
		IDN_LOM_KX642880	E	Herrera et al. 2017
		IND_GU448381	E	Miao et al. 2013
		IND_GU448484	E	Miao et al. 2013
		IND_GU448467	E	Miao et al. 2013
		COL115	E	This study	MN149810
		KOR_DQ629875	E	Lee et al. 2007
		CHN_GU261712_Yunnan	E	Miao et al. 2013
		CHN_AF128319_Zhejiang	E	Fu et al. 1999; GenBank
		CHN_AF512082_Yunnan	E	Liu et al. 2006
		CHN_AF512117_Guizhou	E	Liu et al. 2006
		CHN_AF512121_Guizhou	E	Liu et al. 2006
		CHN_AF512123_Guizhou	E	Liu et al. 2006
		CHN_AF512135_Guizhou	E	Liu et al. 2006
		CHN_AF512139_Hennan	E	Liu et al. 2006
		CHN_AF512148_Hennan	E	Liu et al. 2006
		CHN_AF512265_Sichuan	E	Liu et al. 2006
		CHN_AF512269_Sichuan	E	Liu et al. 2006
		CHN_AF512272_Sichuan	E	Liu et al. 2006
		CHN_AF512330_Sichuan	E	Liu et al. 2006
		CHN_AF512333_Sichuan	E	Liu et al. 2006
		CHN_AY392236_Yunnan	E	Liu et al. 2006
		CHN_AY392238_Yunnan	E	Liu et al. 2006
		CHN_AY392261_Yunnan	E	Liu et al. 2006
		CHN_AY392269_Yunnan	E	Liu et al. 2006
		CHN_AY465993_Jiangxi	E	Liu et al. 2003; GenBank
		IBE_KU527585	E	Luzuriaga-Neira 2017
		IBE_KU527612	E	Luzuriaga-Neira 2017
		AZE_AY704697	E	Liu et al. 2006
		AZE_AY704698	E	Liu et al. 2006
		AZE_AY704699	E	Liu et al. 2006
		AZE_AY704700	E	Liu et al. 2006
		EUR_AY704688	E	Liu et al. 2006
		EUR_AY704689	E	Liu et al. 2006
		EUR_AY704690	E	Liu et al. 2006
		EUR_AY704702	E	Liu et al. 2006
		EUR_AY704703	E	Liu et al. 2006
		EUR_AY704705	E	Liu et al. 2006
		EUR_AY704706	E	Liu et al. 2006
		EUR_AY704707	E	Liu et al. 2006
		EUR_AY704714	E	Liu et al. 2006
		EUR_AY704715	E	Liu et al. 2006
		EUR_AY704721	E	Liu et al. 2006
		EUR_AY704722	E	Liu et al. 2006
		EUR_AY704724	E	Liu et al. 2006
		TKM_AY704725	E	Liu et al. 2006
		TKM_AY704726	E	Liu et al. 2006
		TKM_AY704727	E	Liu et al. 2006
		IBE_KU527568	E	Luzuriaga-Neira 2017
		IBE_KU527570	E	Luzuriaga-Neira 2017
		IBE_KU527572	E	Luzuriaga-Neira 2017
		IBE_KU527574	E	Luzuriaga-Neira 2017
		IBE_KU527575	E	Luzuriaga-Neira 2017
		IBE_KU527576	E	Luzuriaga-Neira 2017
		IBE_KU527578	E	Luzuriaga-Neira 2017
		IBE_KU527579	E	Luzuriaga-Neira 2017
		IBE_KU527580	E	Luzuriaga-Neira 2017
		IBE_KU527586	E	Luzuriaga-Neira 2017
		IBE_KU527597	E	Luzuriaga-Neira 2017
		IBE_KU527600	E	Luzuriaga-Neira 2017
		IBE_KU527603	E	Luzuriaga-Neira 2017
		IBE_KU527605	E	Luzuriaga-Neira 2017
		IBE_KU527606	E	Luzuriaga-Neira 2017
		IBE_KU527613	E	Luzuriaga-Neira 2017
		IBE_KU527616	E	Luzuriaga-Neira 2017
		IBE_KU527618	E	Luzuriaga-Neira 2017
		IBE_KU527622	E	Luzuriaga-Neira 2017
		IBE_KU527625	E	Luzuriaga-Neira 2017
		IBE_KU527626	E	Luzuriaga-Neira 2017
		IBE_KU527629	E	Luzuriaga-Neira 2017
		IBE_KU527635	E	Luzuriaga-Neira 2017
		IBE_KU527636	E	Luzuriaga-Neira 2017
		CHL_KU508836	E	Luzuriaga-Neira 2017
		CHL_KU508839	E	Luzuriaga-Neira 2017
		CHL_KU508841	E	Luzuriaga-Neira 2017
		CHL_KU508843	E	Luzuriaga-Neira 2017
		CHL_KU508844	E	Luzuriaga-Neira 2017
		CHL_KU508845	E	Luzuriaga-Neira 2017
		CHL_KU508847	E	Luzuriaga-Neira 2017
		CHL_KU508848	E	Luzuriaga-Neira 2017
		CHL_KU508849	E	Luzuriaga-Neira 2017
		CHL_KU508851	E	Luzuriaga-Neira 2017
		CHL_KU508853	E	Luzuriaga-Neira 2017
		CHL_KU508854	E	Luzuriaga-Neira 2017
		CHL_KU508855	E	Luzuriaga-Neira 2017
		ECU_KU5089_13	E	Luzuriaga-Neira 2017
		ECU_KU5089_28	E	Luzuriaga-Neira 2017
		ECU_KU5089_29	E	Luzuriaga-Neira 2017
		ECU_KU5089_47	E	Luzuriaga-Neira 2017
		ECU_KU5089_51	E	Luzuriaga-Neira 2017
		COL_KX513789	E	Luzuriaga-Neira 2017
		COL_KX513790	E	Luzuriaga-Neira 2017
		COL_KX513797	E	Luzuriaga-Neira 2017
		PER_D10	E	This study	MN149860
		PER_D04	E	This study	MN149854
		PER_D11	E	This study	MN149861
		PER_D09	E	This study	MN149859
		PER_D07	E	This study	MN149857
		BRA_KF800718	E	Herkenhoff et al., GenBank
		BRA_KF800728	E	Herkenhoff et al., GenBank
		BRA_Jof8	E	This study	MN149658
		BRA_Jom1	E	This study	MN149660
		CHL_226ARA	E	This study	MN149675
		CHL_507ARA	E	This study	MN149684
		CHL_510ARA	E	This study	MN149687
		CHL_519ARA	E	This study	MN149690
		CHL_851ARA	E	This study	MN149696
		CHL_852ARA	E	This study	MN149697
		CHL_853ARA	E	This study	MN149698
		CHL_854ARA	E	This study	MN149699
		CHL_855ARA	E	This study	MN149700
		CHL_856ARA	E	This study	MN149701
		CHL_857ARA	E	This study	MN149702
		CHL_872ARA	E	This study	MN149703
		CHL_875ARA	E	This study	MN149706
		CHL_TRA_1	E	This study	MN149718
		CHL_TRA_3	E	This study	MN149720
		COL2	E	This study	MN149724
		COL3	E	This study	MN149725
		COL4	E	This study	MN149726
		COL5	E	This study	MN149727
		COL6	E	This study	MN149728
		COL7	E	This study	MN149729
		COL8	E	This study	MN149730
		COL9	E	This study	MN149731
		COL11	E	This study	MN149732
		COL12	E	This study	MN149733
		COL13	E	This study	MN149734
		COL15	E	This study	MN149735
		COL16	E	This study	MN149736
		COL18	E	This study	MN149737
		COL19	E	This study	MN149738
		COL20	E	This study	MN149739
		COL21	E	This study	MN149740
		COL22	E	This study	MN149741
		COL24	E	This study	MN149743
		COL25	E	This study	MN149744
		COL27	E	This study	MN149746
		COL29	E	This study	MN149748
		COL30	E	This study	MN149749
		COL31	E	This study	MN149750
		COL32	E	This study	MN149751
		COL35	E	This study	MN149754
		COL38	E	This study	MN149757
		COL39	E	This study	MN149758
		COL41	E	This study	MN149760
		COL43	E	This study	MN149762
		COL45	E	This study	MN149764
		COL46	E	This study	MN149765
		COL51	E	This study	MN149769
		COL54	E	This study	MN149772
		COL56	E	This study	MN149774
		COL58	E	This study	MN149776
		COL59	E	This study	MN149777
		COL60	E	This study	MN149778
		COL61	E	This study	MN149779
		COL62	E	This study	MN149780
		COL63	E	This study	MN149781
		COL66	E	This study	MN149783
		COL67	E	This study	MN149784
		COL68	E	This study	MN149785
		COL72	E	This study	MN149789
		COL75	E	This study	MN149792
		COL76	E	This study	MN149793
		COL79	E	This study	MN149796
		COL80	E	This study	MN149797
		COL81	E	This study	MN149798
		COL82	E	This study	MN149799
		COL94	E	This study	MN149803
		COL99	E	This study	MN149804
		COL107	E	This study	MN149806
		COL109	E	This study	MN149807
		COL110	E	This study	MN149808
		COL116	E	This study	MN149811
		COL117	E	This study	MN149812
		COL119	E	This study	MN149813
		COL124	E	This study	MN149814
		COL125	E	This study	MN149815
		COL127	E	This study	MN149817
		COL130	E	This study	MN149820
		COL136	E	This study	MN149821
		COL139	E	This study	MN149824
		COL140	E	This study	MN149825
		COL141	E	This study	MN149826
		COL145	E	This study	MN149829
		COL148	E	This study	MN149831
		COL150	E	This study	MN149833
		COL152	E	This study	MN149834
		COL153	E	This study	MN149835
		COL155	E	This study	MN149837
		COL156	E	This study	MN149838
		COL157	E	This study	MN149839
		COL159	E	This study	MN149841
		COL161	E	This study	MN149843
		COL162	E	This study	MN149844
		COL163	E	This study	MN149845
		COL165	E	This study	MN149847
		COL167	E	This study	MN149849
		COL169	E	This study	MN149851
		CHL_KU508832	E	Luzuriaga-Neira 2017
		CHL_KU508833	E	Luzuriaga-Neira 2017
		CHL_KU508834	E	Luzuriaga-Neira 2017
		CHL_KU508842	E	Luzuriaga-Neira 2017
		CHL_KU508846	E	Luzuriaga-Neira 2017
		CHL_KU508850	E	Luzuriaga-Neira 2017
		CHL_KU508852	E	Luzuriaga-Neira 2017
		CHL_KU508857	E	Luzuriaga-Neira 2017
		CHL_KU508858	E	Luzuriaga-Neira 2017
		CHL_KU508859	E	Luzuriaga-Neira 2017
		CHL_KU508864	E	Luzuriaga-Neira 2017
		CHL_KU508866	E	Luzuriaga-Neira 2017
		CHL_KU508867	E	Luzuriaga-Neira 2017
		CHL_KU508868	E	Luzuriaga-Neira 2017
		CHL_KU508869	E	Luzuriaga-Neira 2017
		ECU_KU5088	E	Luzuriaga-Neira 2017
		ECU_KU5088_3	E	Luzuriaga-Neira 2017
		ECU_KU5088_4	E	Luzuriaga-Neira 2017
		ECU_KU5088_7	E	Luzuriaga-Neira 2017
		ECU_KU5088_8	E	Luzuriaga-Neira 2017
		ECU_KU5088_12	E	Luzuriaga-Neira 2017
		ECU_KU5088_14	E	Luzuriaga-Neira 2017
		ECU_KU5088_17	E	Luzuriaga-Neira 2017
		ECU_KU5088_18	E	Luzuriaga-Neira 2017
		ECU_KU5088_19	E	Luzuriaga-Neira 2017
		ECU_KU5088_20	E	Luzuriaga-Neira 2017
		ECU_KU5088_22	E	Luzuriaga-Neira 2017
		ECU_KU5088_26	E	Luzuriaga-Neira 2017
		ECU_KU5089_9	E	Luzuriaga-Neira 2017
		ECU_KU5089_10	E	Luzuriaga-Neira 2017
		ECU_KU5089_11	E	Luzuriaga-Neira 2017
		ECU_KU5089_12	E	Luzuriaga-Neira 2017
		ECU_KU5089_14	E	Luzuriaga-Neira 2017
		ECU_KU5089_16	E	Luzuriaga-Neira 2017
		ECU_KU5089_25	E	Luzuriaga-Neira 2017
		ECU_KU5089_26	E	Luzuriaga-Neira 2017
		ECU_KU5089_27	E	Luzuriaga-Neira 2017
		ECU_KU5089_36	E	Luzuriaga-Neira 2017
		ECU_KU5089_37	E	Luzuriaga-Neira 2017
		ECU_KU5089_40	E	Luzuriaga-Neira 2017
		ECU_KU5089_41	E	Luzuriaga-Neira 2017
		ECU_KU5089_42	E	Luzuriaga-Neira 2017
		ECU_KU5089_48	E	Luzuriaga-Neira 2017
		ECU_KU5089_52	E	Luzuriaga-Neira 2017
		PER_KU508954	E	Luzuriaga-Neira 2017
		PER_KU508960	E	Luzuriaga-Neira 2017
		PER_KU508963	E	Luzuriaga-Neira 2017
		PER_KU508965	E	Luzuriaga-Neira 2017
		PER_KU508969	E	Luzuriaga-Neira 2017
		PER_KU508971	E	Luzuriaga-Neira 2017
		PER_KU508972	E	Luzuriaga-Neira 2017
		BOL_KX513778	E	Luzuriaga-Neira 2017
		BOL_KX513780	E	Luzuriaga-Neira 2017
		BOL_KX513781	E	Luzuriaga-Neira 2017
		BOL_KX513787	E	Luzuriaga-Neira 2017
		COL_KX513788	E	Luzuriaga-Neira 2017
		COL_KX513791	E	Luzuriaga-Neira 2017
		COL_KX513792	E	Luzuriaga-Neira 2017
		COL_KX513793	E	Luzuriaga-Neira 2017
		COL_KX513794	E	Luzuriaga-Neira 2017
		COL_KX513795	E	Luzuriaga-Neira 2017
		COL_KX513798	E	Luzuriaga-Neira 2017
		BRA_KF800715	E	Herkenhoff et al., GenBank
		BRA_KF800716	E	Herkenhoff et al., GenBank
		BRA_KF800717	E	Herkenhoff et al., GenBank
		BRA_KF800725	E	Herkenhoff et al., GenBank
		BRA_KF800727	E	Herkenhoff et al., GenBank
		CHL_ARA_D07	E	This study	MN149712
		CHL_ARA_E07	E	This study	MN149714
		CHL_ARA_H07	E	This study	MN149717
		CHL_EF190831	E	Gongora et al. 2008
		CHL_EF190834	E	Gongora et al. 2008
		CHL_EF190835	E	Gongora et al. 2008
		CHL_EF190836	E	Gongora et al. 2008
		CHL_EF190838	E	Gongora et al. 2008
		CHL_EF190839	E	Gongora et al. 2008
		CHL_EF190840	E	Gongora et al. 2008
		CHL_EF190841	E	Gongora et al. 2008
		CHL_EF190842	E	Gongora et al. 2008
		CHL_EF190844	E	Gongora et al. 2008
		CHL_EF190845	E	Gongora et al. 2008
		CHL_EF190847	E	Gongora et al. 2008
		CHL_EF190851	E	Gongora et al. 2008
		CHL_EF190853	E	Gongora et al. 2008
		CHL_EF190854	E	Gongora et al. 2008
		CHL_EF190856	E	Gongora et al. 2008
		CHL_EF190859	E	Gongora et al. 2008
		CHL_EF190860	E	Gongora et al. 2008
		CHL_EF190861	E	Gongora et al. 2008
		CHL_EF190864	E	Gongora et al. 2008
		CHL_EF190865	E	Gongora et al. 2008
		CHL_EF190866	E	Gongora et al. 2008
		CHL_EF190867	E	Gongora et al. 2008
		CHL_EF190868	E	Gongora et al. 2008
		CHL_EF190869	E	Gongora et al. 2008
		IDN_AC_KX642437	E	Herrera et al. 2017
		IDN_MED_KX643009	E	Herrera et al. 2017
		IDN_NNU_KX643056	E	Herrera et al. 2017
		IDN_NUN_KX643038	E	Herrera et al. 2017
		IDN_NUN_KX643039	E	Herrera et al. 2017
		IDN_NUN_KX643040	E	Herrera et al. 2017
		IDN_SBW_KX643148	E	Herrera et al. 2017
		IDN_TAN_KX643206	E	Herrera et al. 2017
		IDN_TAN_KX643207	E	Herrera et al. 2017
		IDN_TAN_KX643208	E	Herrera et al. 2017
		IDN_TAN_KX643209	E	Herrera et al. 2017
		IDN_TAN_KX643215	E	Herrera et al. 2017
		PHL_ALU_KX642462	E	Herrera et al. 2017
		PHL_BUT_KX642529	E	Herrera et al. 2017
		PHL_BUT_KX642530	E	Herrera et al. 2017
		PHL_BUT_KX642532	E	Herrera et al. 2017
		PHL_CEB_KX642546	E	Herrera et al. 2017
		PHL_CEB_KX642548	E	Herrera et al. 2017
		PHL_COT_KX642589	E	Herrera et al. 2017
		PHL_DO_KX642594	E	Herrera et al. 2017
		PHL_IFU_KX642690	E	Herrera et al. 2017
		PHL_INT_KX642711	E	Herrera et al. 2017
		PHL_INT_KX642713	E	Herrera et al. 2017
		PHL_ISA_KX642718	E	Herrera et al. 2017
		PHL_KAL_KX642772	E	Herrera et al. 2017
		PHL_KAL_KX642773	E	Herrera et al. 2017
		PHL_KAL_KX642774	E	Herrera et al. 2017
		PHL_KAL_KX642776	E	Herrera et al. 2017
		PHL_LIB_KX642869	E	Herrera et al. 2017
		PHL_LUG_KX642890	E	Herrera et al. 2017
		PHL_LUR_KX642892	E	Herrera et al. 2017
		PHL_LUZ_KX642896	E	Herrera et al. 2017
		PHL_MDR_KX643024	E	Herrera et al. 2017
		PHL_MTC_KX642981	E	Herrera et al. 2017
		PHL_NAA_KX643033	E	Herrera et al. 2017
		PHL_PAL_KX643082	E	Herrera et al. 2017
		PHL_SC_KX643118	E	Herrera et al. 2017
		PHL_SJ_KX643119	E	Herrera et al. 2017
		PHL_SJ_KX643120	E	Herrera et al. 2017
		PHL_SOR_KX643132	E	Herrera et al. 2017
		PHL_TAL_KX643191	E	Herrera et al. 2017
		PHL_TAL_KX643192	E	Herrera et al. 2017
		PHL_TAL_KX643193	E	Herrera et al. 2017
		PHL_TAL_KX643195	E	Herrera et al. 2017
		PHL_TAL_KX643197	E	Herrera et al. 2017
		PHL_TAL_KX643198	E	Herrera et al. 2017
		PHL_TAL_KX643199	E	Herrera et al. 2017
		PHL_TUG_KX643247	E	Herrera et al. 2017
		PHL_TUG_KX643248	E	Herrera et al. 2017
		PHL_TUG_KX643252	E	Herrera et al. 2017
		PHL_ZAM_KX643329	E	Herrera et al. 2017
		PHL_CAM_KX642540	E	Herrera et al. 2017
		PHL_ISA_KX642717	E	Herrera et al. 2017
		VNM_KX643137	E	Herrera et al. 2017
		MMR_GU447894	E	Miao et al. 2013
		VNM_GU447935	E	Miao et al. 2013
		VNM_GU447922	E	Miao et al. 2013
		VNM_GU447924	E	Miao et al. 2013
		VNM_GU447926	E	Miao et al. 2013
		VNM_GU447927	E	Miao et al. 2013
		VNM_GU447937	E	Miao et al. 2013
		BGD_KC260972	E	Bhuiyan et al. 2013
		BGD_KC260978	E	Bhuiyan et al. 2013
		BGD_KC260995	E	Bhuiyan et al. 2013
		BGD_KC261020	E	Bhuiyan et al. 2013
		BGD_KC261059	E	Bhuiyan et al. 2013
		BGD_KC261065	E	Bhuiyan et al. 2013
		BGD_KC261025	E	Bhuiyan et al. 2013
		IND_AY644966	E	Liu et al. 2006
		IND_AY644968	E	Liu et al. 2006
		IND_AY704702	E	Liu et al. 2006
		IND_AY704703	E	Liu et al. 2006
		IND_AY704705	E	Liu et al. 2006
		IND_AY704706	E	Liu et al. 2006
		IND_AY704707	E	Liu et al. 2006
		IND_AY704714	E	Liu et al. 2006
		IND_AY704715	E	Liu et al. 2006
		IND_GU261709	E	Miao et al. 2013
		IND_GU447485	E	Miao et al. 2013
		IND_GU447490	E	Miao et al. 2013
		IND_GU447492	E	Miao et al. 2013
		IND_GU447495	E	Miao et al. 2013
		IND_GU448393	E	Miao et al. 2013
		IND_GU448410	E	Miao et al. 2013
		IND_GU448418	E	Miao et al. 2013
		IND_GU448434	E	Miao et al. 2013
		IND_GU448438	E	Miao et al. 2013
		IND_GU448460	E	Miao et al. 2013
		IND_GU448472	E	Miao et al. 2013
		IND_GU448727	E	Miao et al. 2013
		IND_GU448755	E	Miao et al. 2013
		IND_GU448756	E	Miao et al. 2013
		IND_GU448763	E	Miao et al. 2013
		IND_GU448949	E	Miao et al. 2013
		IND_GU448958	E	Miao et al. 2013
		IND_GU447587	E	Miao et al. 2013
		IND_GU448457	E	Miao et al. 2013
		IND_GU448462	E	Miao et al. 2013
		IND_GU448731	E	Miao et al. 2013
		IND_GU448739	E	Miao et al. 2013
		IND_GU447589	E	Miao et al. 2013
		IND_GU448259	E	Miao et al. 2013
		IND_GU448382	E	Miao et al. 2013
		IND_GU448729	E	Miao et al. 2013
		IND_GU448732	E	Miao et al. 2013
		IND_GU448742	E	Miao et al. 2013
		IND_GU448269	E	Miao et al. 2013
		IND_GU448402	E	Miao et al. 2013
		IND_GU448432	E	Miao et al. 2013
		IND_GU448433	E	Miao et al. 2013
		IND_GU448448	E	Miao et al. 2013
		IND_GU448956	E	Miao et al. 2013
		IND_GU448272	E	Miao et al. 2013
		IND_GU448275	E	Miao et al. 2013
		IND_GU448357	E	Miao et al. 2013
		IND_GU448375	E	Miao et al. 2013
		IND_GU448430	E	Miao et al. 2013
		IND_GU448774	E	Miao et al. 2013
		IND_GU448779	E	Miao et al. 2013
		IND_GU448360	E	Miao et al. 2013
		IND_GU448361	E	Miao et al. 2013
		IND_GU448368	E	Miao et al. 2013
		IND_GU448385	E	Miao et al. 2013
		IND_GU448401	E	Miao et al. 2013
		IND_GU448425	E	Miao et al. 2013
		IND_GU448440	E	Miao et al. 2013
		IND_GU448463	E	Miao et al. 2013
		IND_GU448465	E	Miao et al. 2013
		IND_GU448474	E	Miao et al. 2013
		IND_GU448738	E	Miao et al. 2013
		IND_GU448744	E	Miao et al. 2013
		IND_GU448747	E	Miao et al. 2013
		IND_GU448749	E	Miao et al. 2013
		IND_GU448760	E	Miao et al. 2013
		IND_GU448762	E	Miao et al. 2013
		IND_GU448771	E	Miao et al. 2013
		IND_GU448918	E	Miao et al. 2013
		IND_GU448963	E	Miao et al. 2013
		IND_GU448366	E	Miao et al. 2013
		IND_GU448399	E	Miao et al. 2013
		IND_GU448428	E	Miao et al. 2013
		IND_GU448435	E	Miao et al. 2013
		IND_GU448447	E	Miao et al. 2013
		IND_GU448451	E	Miao et al. 2013
		IND_GU448478	E	Miao et al. 2013
		IND_GU448728	E	Miao et al. 2013
		IND_GU448757	E	Miao et al. 2013
		IND_GU448764	E	Miao et al. 2013
		IND_GU448954	E	Miao et al. 2013
		IND_GU448372	E	Miao et al. 2013
		IND_GU448443	E	Miao et al. 2013
		IND_GU448772	E	Miao et al. 2013
		IND_GU448959	E	Miao et al. 2013
		IND_GU448373	E	Miao et al. 2013
		IND_GU448392	E	Miao et al. 2013
		IND_GU448396	E	Miao et al. 2013
		IND_GU448397	E	Miao et al. 2013
		IND_GU448377	E	Miao et al. 2013
		IND_GU448412	E	Miao et al. 2013
		IND_GU448429	E	Miao et al. 2013
		IND_GU448733	E	Miao et al. 2013
		IND_GU448761	E	Miao et al. 2013
		IND_GU448380	E	Miao et al. 2013
		IND_GU448919	E	Miao et al. 2013
		IND_GU448417	E	Miao et al. 2013
		IND_GU448439	E	Miao et al. 2013
		IND_GU448455	E	Miao et al. 2013
		IND_GU448459	E	Miao et al. 2013
		IND_GU448461	E	Miao et al. 2013
		IND_GU448470	E	Miao et al. 2013
		IND_GU448735	E	Miao et al. 2013
		IND_GU448737	E	Miao et al. 2013
		IND_GU448748	E	Miao et al. 2013
		IND_GU448734	E	Miao et al. 2013
		IND_GU448961	E	Miao et al. 2013
		CL_AP003317	E	Nishibori et al. 2005
		CL_AP003318	E	Nishibori et al. 2005
		CL_AP003580	E	Nishibori et al. 2005
		CL_AY235570	E	Froman & Kirby 2005
Hap_108	26	KOR_DQ629877	E	Lee et al. 2007
		KOR_DQ629865	E	Lee et al. 2007
		KOR_DQ629864	E	Lee et al. 2007
		KOR_DQ629882	E	Lee et al. 2007
		KOR_DQ629893	E	Lee et al. 2007
		EUR_AY704693	E	Liu et al. 2006
		IBE_KU527630	E	Luzuriaga-Neira 2017
		CHL_KU508835	E	Luzuriaga-Neira 2017
		CHL_EF190858	E	Gongora et al. 2008
		BOL_KX513785	E	Luzuriaga-Neira 2017
		BOL_KX513786	E	Luzuriaga-Neira 2017
		BOL_KX513799	E	Luzuriaga-Neira 2017
		BRA_KF800720	E	Herkenhoff et al., GenBank
		CHL_504ARA	E	This study	MN149682
		IDN_CIA_KX642573	E	Herrera et al. 2017
		IDN_GAR_KX642647	E	Herrera et al. 2017
		IDN_GAR_KX642649	E	Herrera et al. 2017
		IDN_GAR_KX642650	E	Herrera et al. 2017
		IDN_GAR_KX642651	E	Herrera et al. 2017
		IDN_KDU_KX642795	E	Herrera et al. 2017
		BGD_KC261000	E	Bhuiyan et al. 2013
		BGD_KC261011	E	Bhuiyan et al. 2013
		BGD_KC261013	E	Bhuiyan et al. 2013
		BGD_KC261014	E	Bhuiyan et al. 2013
		BGD_KC261015	E	Bhuiyan et al. 2013
		CL_AY235571	E	Froman & Kirby 2005
Hap_109	1	COL158	E	This study	MN149840
Hap_110	1	ECU_KU5089_34	E	Luzuriaga-Neira 2017
Hap_111	2	COL42	E	This study	MN149761
		COL49	E	This study	MN149767
Hap_112	2	EUR_AY704713	E	Liu et al. 2006
		IND_AY704713	E	Liu et al. 2006
Hap_113	4	CHL_EF190837	E	Gongora et al. 2008
		CHL_EF190846	E	Gongora et al. 2008
		CHL_EF190848	E	Gongora et al. 2008
		CHL_EF190855	E	Gongora et al. 2008
Hap_114	1	CHL_TRA_2	E	This study	MN149719
Hap_115	1	CHL_VIL_1	E	This study	MN149721
Hap_116	2	COL36	E	This study	MN149755
		COL71	E	This study	MN149788
Hap_117	1	BOL_KX513782	E	Luzuriaga-Neira 2017
Hap_118	3	COL146	E	This study	MN149830
		ECU_KU5089_49	E	Luzuriaga-Neira 2017
		IND_GU448413	E	Miao et al. 2013
Hap_119	4	CHL_KU508840	E	Luzuriaga-Neira 2017
		ECU_KU5089_15	E	Luzuriaga-Neira 2017
		ECU_KU5089_17	E	Luzuriaga-Neira 2017
		ECU_KU5089_19	E	Luzuriaga-Neira 2017
Hap_120	3	ECU_KU5089_31	E	Luzuriaga-Neira 2017
		IND_GU448449	E	Miao et al. 2013
		IND_GU448456	E	Miao et al. 2013
Hap_121	3	PHL_MDR_KX643025	E	Herrera et al. 2017
		PHL_SOR_KX643127	E	Herrera et al. 2017
		PHL_SOR_KX643129	E	Herrera et al. 2017
Hap_122	2	IND_GU448271	E	Miao et al. 2013
		IND_GU448773	E	Miao et al. 2013
Hap_123	1	IND_GU448414	E	Miao et al. 2013
Hap_124	1	IND_GU448409	E	Miao et al. 2013
Hap_125	1	IND_GU448389	E	Miao et al. 2013
Hap_126	1	IND_GU448468	E	Miao et al. 2013
Hap_127	3	BGD_KC261028	E	Bhuiyan et al. 2013
		BGD_KC261039	E	Bhuiyan et al. 2013
		BGD_KC261040	E	Bhuiyan et al. 2013
Hap_128	23	CHL_209ARA	E	This study	MN149671
		CHL_210ARA	E	This study	MN149672
		CHL_219ARA	E	This study	MN149674
		CHL_232ARA	E	This study	MN149676
		CHL_280ARA	E	This study	MN149677
		CHL_501ARA	E	This study	MN149679
		CHL_502ARA	E	This study	MN149680
		CHL_503ARA	E	This study	MN149681
		CHL_505ARA	E	This study	MN149683
		CHL_509ARA	E	This study	MN149686
		CHL_511ARA	E	This study	MN149688
		CHL_521ARA	E	This study	MN149691
		CHL_806ARA	E	This study	MN149692
		CHL_811ARA	E	This study	MN149693
		CHL_816ARA	E	This study	MN149694
		CHL_873ARA	E	This study	MN149704
		CHL_874ARA	E	This study	MN149705
		CHL_881ARA	E	This study	MN149707
		CHL_ARA_A08	E	This study	MN149708
		CHL_ARA_C07	E	This study	MN149710
		CHL_ARA_D08	E	This study	MN149713
		CHL_ARA_F07	E	This study	MN149715
		CHL_ARA_G07	E	This study	MN149716
Hap_129	2	CHN_AY392176_Yunnan	D	Liu et al. 2006
		CHN_AY392178_Yunnan	D	Liu et al. 2006
Hap_130	2	CHN_AY392185_Yunnan	D	Liu et al. 2006
		CHN_GU261715_Yunnan	D	Miao et al. 2013
Hap_131	1	ECU_KU5088_2	C	Luzuriaga-Neira 2017
Hap_132	1	IND_EU847780	D	Kanginakudru et al. 2008
Hap_133	1	IND_EU847792	D	Kanginakudru et al. 2008
Hap_134	1	CHN_GU261692_Yunnan	C	Miao et al. 2013
Hap_135	2	VNM_AB009435	G	Miyake et al. 1997, GenBank
		VNM_HM462190	G	Berthouly-Salazar et al. 2010
Hap_136	3	PHL_SAM_KX643117	E	Herrera et al. 2017
		PHL_SOR_KX643130	E	Herrera et al. 2017
		PHL_SOR_KX643135	E	Herrera et al. 2017
Hap_137	1	PHL_ZAM_KX643321	E	Herrera et al. 2017
Hap_138	1	IND_EU847745	E	Kanginakudru et al. 2008
Hap_139	1	IND_EU847772	D	Kanginakudru et al. 2008
Hap_140	1	PHL_COT_KX642586	D	Herrera et al. 2017
Hap_141	1	CHN_GU261696_Hainan	D	Miao et al. 2013
Hap_142	2	CHN_AF128317_Zhejiang	D	Fu et al. 1999; GenBank
		CHN_GU261677_Zheijiang	D	Miao et al. 2013
Hap_143	1	CHN_GU261693_Yunnan	D	Miao et al. 2013
Hap_144	1	PHL_ZAM_KX643323	D	Herrera et al. 2017
Hap_145	1	IDN_CIA_KX642574	D	Herrera et al. 2017
Hap_146	1	IDN_CIA_KX642579	D	Herrera et al. 2017
Hap_147	26	CHN_AF512158_Yunnan	C	Liu et al. 2006
		CHN_AF512160_Yunnan	C	Liu et al. 2006
		CHN_AF512165_Yunnan	C	Liu et al. 2006
		CHN_AF512166_Yunnan	C	Liu et al. 2006
		CHN_AF512168_Yunnan	C	Liu et al. 2006
		CHN_AF512171_Yunnan	C	Liu et al. 2006
		CHN_AF512177_Yunnan	C	Liu et al. 2006
		CHN_AF512178_Yunnan	C	Liu et al. 2006
		CHN_AY588636_Fujian	C	Qu et al. 2004; GenBank
		EUR_AY704718	C	Liu et al. 2006
		MMR_AF512183	C	Liu et al. 2006
		MMR_AF512187	C	Liu et al. 2006
		MMR_GU261716	C	Miao et al. 2013
		MMR_GU448494	C	Miao et al. 2013
		BGD_KC260994	C	Bhuiyan et al. 2013
		BGD_KC260996	C	Bhuiyan et al. 2013
		BGD_KC260999	C	Bhuiyan et al. 2013
		BGD_KC261027	C	Bhuiyan et al. 2013
		BGD_KC261033	C	Bhuiyan et al. 2013
		BGD_KC261034	C	Bhuiyan et al. 2013
		BGD_KC261041	C	Bhuiyan et al. 2013
		BGD_KC261043	C	Bhuiyan et al. 2013
		IND_AY644970	C	Liu et al. 2006
		IND_AY704718	C	Liu et al. 2006
		IND_GU447584	C	Miao et al. 2013
		IND_GU448951	C	Miao et al. 2013
Hap_148	3	IND_AY644971	C	Liu et al. 2006
		IND_GU261707	C	Miao et al. 2013
		IND_GU447583	C	Miao et al. 2013
Hap_149	1	IDN_KEN_KX642778	D	Herrera et al. 2017
Hap_150	6	IDN_KEN_KX642779	D	Herrera et al. 2017
		IDN_KEN_KX642780	D	Herrera et al. 2017
		IDN_KEN_KX642789	D	Herrera et al. 2017
		IDN_KEN_KX642790	D	Herrera et al. 2017
		IDN_KEN_KX642791	D	Herrera et al. 2017
		IDN_KEN_KX642792	D	Herrera et al. 2017
Hap_151	16	IND_EU847783	D	Kanginakudru et al. 2008
		IND_EU847794	D	Kanginakudru et al. 2008
		IND_EU847750	D	Kanginakudru et al. 2008
		IND_EU847749	D	Kanginakudru et al. 2008
		IND_EU847746	D	Kanginakudru et al. 2008
		IND_EU847787	D	Kanginakudru et al. 2008
		IND_EU847789	D	Kanginakudru et al. 2008
		IND_EU847781	D	Kanginakudru et al. 2008
		IND_EU847788	D	Kanginakudru et al. 2008
		IND_EU847786	D	Kanginakudru et al. 2008
		IND_EU847784	D	Kanginakudru et al. 2008
		IND_EU847785	D	Kanginakudru et al. 2008
		IND_EU847751	D	Kanginakudru et al. 2008
		IND_EU847799	D	Kanginakudru et al. 2008
		IND_EU847798	D	Kanginakudru et al. 2008
		IND_EU847790	D	Kanginakudru et al. 2008
Hap_152	1	IND_EU847795	D	Kanginakudru et al. 2008
Hap_153	1	IND_EU847748	D	Kanginakudru et al. 2008
Hap_154	1	IND_EU847800	D	Kanginakudru et al. 2008
Hap_155	2	PHL_VAL_KX643255	D	Herrera et al. 2017
		PHL_VAL_KX643256	D	Herrera et al. 2017
Hap_156	1	CHN_GU261674_Hainan	D	Miao et al. 2013
Hap_157	5	IDN_NNU_KX643049	D	Herrera et al. 2017
		IDN_NNU_KX643050	D	Herrera et al. 2017
		IDN_NUN_KX643037	D	Herrera et al. 2017
		IDN_TAR_KX643225	D	Herrera et al. 2017
		IDN_TAR_KX643227	D	Herrera et al. 2017
Hap_158	12	PHL_ASI_KX642468	D	Herrera et al. 2017
		PHL_ILC_KX642703	D	Herrera et al. 2017
		PHL_ILC_KX642704	D	Herrera et al. 2017
		PHL_ISA_KX642719	D	Herrera et al. 2017
		PHL_SAM_KX643113	D	Herrera et al. 2017
		PHL_IFU_KX642688	D	Herrera et al. 2017
		PHL_MDR_KX643017	D	Herrera et al. 2017
		PHL_PAL_KX643060	D	Herrera et al. 2017
		PHL_PAL_KX643069	D	Herrera et al. 2017
		PHL_PAL_KX643076	D	Herrera et al. 2017
		PHL_PAL_KX643077	D	Herrera et al. 2017
		PHL_MDR_KX643031	D	Herrera et al. 2017
Hap_159	1	PHL_TUG_KX643253	D	Herrera et al. 2017
Hap_160	1	IDN_POS_KX643099	D	Herrera et al. 2017
Hap_161	1	THA_AB009432	D	Miyake et al. 1997, GenBank
Hap_162	2	IND_GU261680	C	Miao et al. 2013
		IND_GU448724	C	Miao et al. 2013
Hap_163	2	ECU_KU5088_6	C	Luzuriaga-Neira 2017
		THA_CHKMTG05	C	Fumihito 1996, GenBank
Hap_164	1	IND_EU847797	D	Kanginakudru et al. 2008
Hap_165	1	IND_EU847747	D	Kanginakudru et al. 2008
Hap_166	1	IND_EU847782	D	Kanginakudru et al. 2008
Hap_167	1	IND_EU847791	D	Kanginakudru et al. 2008
Hap_168	1	IND_EU847796	D	Kanginakudru et al. 2008
Hap_169	1	IDN_SBW_KX643146	E	Herrera et al. 2017
Hap_170	2	CHN_AF512152_Yunnan	D	Liu et al. 2006
		CHN_AF512156_Yunnan	D	Liu et al. 2006
Hap_171	30	IND_GU448726	D	Miao et al. 2013
		EUR_AY704701	D	Liu et al. 2006
		EUR_AY704710	D	Liu et al. 2006
		EUR_AY704711	D	Liu et al. 2006
		EUR_AY704716	D	Liu et al. 2006
		EUR_AY704717	D	Liu et al. 2006
		IND_AY704701	D	Liu et al. 2006
		IND_AY704710	D	Liu et al. 2006
		IND_AY704711	D	Liu et al. 2006
		IND_AY704716	D	Liu et al. 2006
		IND_AY704717	D	Liu et al. 2006
		IND_GU261697	D	Miao et al. 2013
		IND_GU447491	D	Miao et al. 2013
		IND_GU448750	D	Miao et al. 2013
		IND_GU448260	D	Miao et al. 2013
		IND_GU448267	D	Miao et al. 2013
		IND_GU448268	D	Miao et al. 2013
		IND_GU448273	D	Miao et al. 2013
		IND_GU448277	D	Miao et al. 2013
		IND_GU448270	D	Miao et al. 2013
		IND_GU448276	D	Miao et al. 2013
		IND_GU448725	D	Miao et al. 2013
		IND_GU448746	D	Miao et al. 2013
		IND_GU448759	D	Miao et al. 2013
		IND_GU448765	D	Miao et al. 2013
		IND_GU448736	D	Miao et al. 2013
		IND_GU448745	D	Miao et al. 2013
		IND_GU448768	D	Miao et al. 2013
		IND_GU448769	D	Miao et al. 2013
		IND_GU448920	D	Miao et al. 2013
Hap_172	102	IDN_KEN_KX642784	D	Herrera et al. 2017
		EUR_AY704719	D	Liu et al. 2006
		IDN_AC_KX642440	D	Herrera et al. 2017
		IDN_AC_KX642444	D	Herrera et al. 2017
		IDN_AC_KX642450	D	Herrera et al. 2017
		IDN_AC_KX642458	D	Herrera et al. 2017
		IDN_BEN_KX642509	D	Herrera et al. 2017
		IDN_BEN_KX642513	D	Herrera et al. 2017
		IDN_BEN_KX642514	D	Herrera et al. 2017
		IDN_BEN_KX642515	D	Herrera et al. 2017
		IDN_BEN_KX642517	D	Herrera et al. 2017
		IDN_BEN_KX642518	D	Herrera et al. 2017
		IDN_BEN_KX642519	D	Herrera et al. 2017
		IDN_GOM_KX642674	D	Herrera et al. 2017
		IDN_GOM_KX642679	D	Herrera et al. 2017
		IDN_KEN_KX642783	D	Herrera et al. 2017
		IDN_LAM_KX642854	D	Herrera et al. 2017
		IDN_LOM_KX642870	D	Herrera et al. 2017
		IDN_LOM_KX642884	D	Herrera et al. 2017
		IDN_MED_KX642994	D	Herrera et al. 2017
		IDN_MED_KX642995	D	Herrera et al. 2017
		IDN_MED_KX642999	D	Herrera et al. 2017
		IDN_MED_KX643000	D	Herrera et al. 2017
		IDN_MED_KX643004	D	Herrera et al. 2017
		IDN_MED_KX643005	D	Herrera et al. 2017
		IDN_MED_KX643008	D	Herrera et al. 2017
		IDN_MLK_KX642908	D	Herrera et al. 2017
		IDN_MLK_KX642915	D	Herrera et al. 2017
		IDN_MLK_KX642918	D	Herrera et al. 2017
		IDN_MLK_KX642940	D	Herrera et al. 2017
		IDN_MLK_KX642941	D	Herrera et al. 2017
		IDN_MLK_KX642948	D	Herrera et al. 2017
		IDN_MND_KX642956	D	Herrera et al. 2017
		IDN_MND_KX642957	D	Herrera et al. 2017
		IDN_MND_KX642958	D	Herrera et al. 2017
		IDN_NNU_KX643048	D	Herrera et al. 2017
		IDN_NNU_KX643051	D	Herrera et al. 2017
		IDN_NT_KX642605	D	Herrera et al. 2017
		IDN_NT_KX642634	D	Herrera et al. 2017
		IDN_NUN_KX643042	D	Herrera et al. 2017
		IDN_SBW_KX643139	D	Herrera et al. 2017
		IDN_SBW_KX643140	D	Herrera et al. 2017
		IDN_SBW_KX643155	D	Herrera et al. 2017
		IDN_SBW_KX643180	D	Herrera et al. 2017
		IDN_TAR_KX643239	D	Herrera et al. 2017
		IDN_TAR_KX643244	D	Herrera et al. 2017
		IDN_WS_KX643266	D	Herrera et al. 2017
		IDN_WS_KX643272	D	Herrera et al. 2017
		IDN_WS_KX643273	D	Herrera et al. 2017
		IDN_WS_KX643274	D	Herrera et al. 2017
		IDN_WS_KX643279	D	Herrera et al. 2017
		IDN_WS_KX643285	D	Herrera et al. 2017
		IDN_WS_KX643291	D	Herrera et al. 2017
		IDN_WS_KX643292	D	Herrera et al. 2017
		IDN_WS_KX643294	D	Herrera et al. 2017
		PHL_AYA_KX642471	D	Herrera et al. 2017
		PHL_CAR_KX642541	D	Herrera et al. 2017
		PHL_CAR_KX642542	D	Herrera et al. 2017
		PHL_CAR_KX642543	D	Herrera et al. 2017
		PHL_CAR_KX642544	D	Herrera et al. 2017
		PHL_CAR_KX642545	D	Herrera et al. 2017
		PHL_COT_KX642588	D	Herrera et al. 2017
		PHL_DAM_KX642592	D	Herrera et al. 2017
		PHL_DO_KX642599	D	Herrera et al. 2017
		PHL_IFU_KX642680	D	Herrera et al. 2017
		PHL_IFU_KX642681	D	Herrera et al. 2017
		PHL_IFU_KX642682	D	Herrera et al. 2017
		PHL_ILO_KX642708	D	Herrera et al. 2017
		PHL_ILO_KX642709	D	Herrera et al. 2017
		PHL_ILO_KX642710	D	Herrera et al. 2017
		PHL_INT_KX642714	D	Herrera et al. 2017
		PHL_INT_KX642715	D	Herrera et al. 2017
		PHL_KIB_KX642849	D	Herrera et al. 2017
		PHL_KIB_KX642850	D	Herrera et al. 2017
		PHL_KPN_KX642777	D	Herrera et al. 2017
		PHL_MTC_KX642984	D	Herrera et al. 2017
		PHL_PAL_KX643071	D	Herrera et al. 2017
		PHL_PAL_KX643073	D	Herrera et al. 2017
		PHL_PAL_KX643075	D	Herrera et al. 2017
		PHL_PAL_KX643080	D	Herrera et al. 2017
		PHL_PAL_KX643086	D	Herrera et al. 2017
		PHL_SAM_KX643112	D	Herrera et al. 2017
		PHL_SJ_KX643123	D	Herrera et al. 2017
		PHL_SOR_KX643131	D	Herrera et al. 2017
		PHL_TAL_KX643201	D	Herrera et al. 2017
		PHL_TAL_KX643202	D	Herrera et al. 2017
		PHL_TAL_KX643204	D	Herrera et al. 2017
		PHL_ZAM_KX643322	D	Herrera et al. 2017
		PHL_ZAM_KX643331	D	Herrera et al. 2017
		PHL_ZAM_KX643332	D	Herrera et al. 2017
		IDN_BEN_KX642520	D	Herrera et al. 2017
		IDN_BEN_KX642521	D	Herrera et al. 2017
		PHL_BAS_KX642487	D	Herrera et al. 2017
		PHL_INT_KX642716	D	Herrera et al. 2017
		PHL_ZAM_KX643320	D	Herrera et al. 2017
		LAO_GU261687	D	Miao et al. 2013
		LAO_GU448846	D	Miao et al. 2013
		VNM_HM462178	D	Berthouly-Salazar et al. 2010
		IND_AY704719	D	Liu et al. 2006
		IDN_NC007237	D	Nishibori et al. 2005
		IDN_WS_KX643276	D	Herrera et al. 2017
		PHL_ILO_KX642706	D	Herrera et al. 2017
Hap_173	3	IDN_AC_KX642457	D	Herrera et al. 2017
		IDN_AC_KX642460	D	Herrera et al. 2017
		PHL_MTC_KX642985	D	Herrera et al. 2017
Hap_174	281	IDN_LOM_KX642873	D	Herrera et al. 2017
		IDN_NT_KX642603	D	Herrera et al. 2017
		IDN_NT_KX642606	D	Herrera et al. 2017
		IDN_NT_KX642608	D	Herrera et al. 2017
		IDN_NT_KX642621	D	Herrera et al. 2017
		IDN_NT_KX642644	D	Herrera et al. 2017
		CHN_AY588625_Shandong	D	Qu et al. 2004; GenBank
		CHN_GU261683_Xinjiang	D	Miao et al. 2013
		IDN_AC_KX642439	D	Herrera et al. 2017
		IDN_AC_KX642441	D	Herrera et al. 2017
		IDN_AC_KX642446	D	Herrera et al. 2017
		IDN_AC_KX642447	D	Herrera et al. 2017
		IDN_AC_KX642448	D	Herrera et al. 2017
		IDN_AC_KX642449	D	Herrera et al. 2017
		IDN_AC_KX642453	D	Herrera et al. 2017
		IDN_AC_KX642454	D	Herrera et al. 2017
		IDN_AC_KX642455	D	Herrera et al. 2017
		IDN_AC_KX642456	D	Herrera et al. 2017
		IDN_AC_KX642461	D	Herrera et al. 2017
		IDN_BAN_KX642479	D	Herrera et al. 2017
		IDN_BAN_KX642480	D	Herrera et al. 2017
		IDN_BAN_KX642483	D	Herrera et al. 2017
		IDN_BAN_KX642484	D	Herrera et al. 2017
		IDN_BEN_KX642500	D	Herrera et al. 2017
		IDN_BEN_KX642501	D	Herrera et al. 2017
		IDN_BEN_KX642516	D	Herrera et al. 2017
		IDN_CIA_KX642575	D	Herrera et al. 2017
		IDN_CIA_KX642576	D	Herrera et al. 2017
		IDN_CIA_KX642577	D	Herrera et al. 2017
		IDN_CIA_KX642580	D	Herrera et al. 2017
		IDN_CIA_KX642581	D	Herrera et al. 2017
		IDN_CIA_KX642582	D	Herrera et al. 2017
		IDN_CIA_KX642583	D	Herrera et al. 2017
		IDN_CIR_KX642560	D	Herrera et al. 2017
		IDN_CIR_KX642561	D	Herrera et al. 2017
		IDN_CIR_KX642562	D	Herrera et al. 2017
		IDN_CIR_KX642563	D	Herrera et al. 2017
		IDN_CIR_KX642564	D	Herrera et al. 2017
		IDN_CIR_KX642565	D	Herrera et al. 2017
		IDN_CIR_KX642569	D	Herrera et al. 2017
		IDN_CIR_KX642571	D	Herrera et al. 2017
		IDN_CIS_KX642551	D	Herrera et al. 2017
		IDN_CIS_KX642552	D	Herrera et al. 2017
		IDN_CIS_KX642553	D	Herrera et al. 2017
		IDN_CIS_KX642554	D	Herrera et al. 2017
		IDN_CIS_KX642555	D	Herrera et al. 2017
		IDN_GAR_KX642653	D	Herrera et al. 2017
		IDN_GAR_KX642658	D	Herrera et al. 2017
		IDN_GAR_KX642660	D	Herrera et al. 2017
		IDN_GOM_KX642661	D	Herrera et al. 2017
		IDN_GOM_KX642663	D	Herrera et al. 2017
		IDN_GOM_KX642665	D	Herrera et al. 2017
		IDN_GOM_KX642666	D	Herrera et al. 2017
		IDN_GOM_KX642669	D	Herrera et al. 2017
		IDN_GOM_KX642673	D	Herrera et al. 2017
		IDN_GOM_KX642676	D	Herrera et al. 2017
		IDN_GOM_KX642677	D	Herrera et al. 2017
		IDN_GOM_KX642678	D	Herrera et al. 2017
		IDN_JAT_KX642721	D	Herrera et al. 2017
		IDN_JAT_KX642724	D	Herrera et al. 2017
		IDN_JAT_KX642726	D	Herrera et al. 2017
		IDN_JAT_KX642727	D	Herrera et al. 2017
		IDN_JAT_KX642728	D	Herrera et al. 2017
		IDN_JAT_KX642729	D	Herrera et al. 2017
		IDN_JAT_KX642730	D	Herrera et al. 2017
		IDN_JAT_KX642731	D	Herrera et al. 2017
		IDN_JAT_KX642732	D	Herrera et al. 2017
		IDN_JAT_KX642733	D	Herrera et al. 2017
		IDN_JT_KX642737	D	Herrera et al. 2017
		IDN_JT_KX642743	D	Herrera et al. 2017
		IDN_JT_KX642747	D	Herrera et al. 2017
		IDN_KDU_KX642798	D	Herrera et al. 2017
		IDN_KDU_KX642801	D	Herrera et al. 2017
		IDN_KDU_KX642803	D	Herrera et al. 2017
		IDN_KDU_KX642812	D	Herrera et al. 2017
		IDN_KDU_KX642820	D	Herrera et al. 2017
		IDN_KDU_KX642821	D	Herrera et al. 2017
		IDN_KDU_KX642823	D	Herrera et al. 2017
		IDN_KDU_KX642829	D	Herrera et al. 2017
		IDN_KDU_KX642830	D	Herrera et al. 2017
		IDN_KDU_KX642831	D	Herrera et al. 2017
		IDN_KDU_KX642832	D	Herrera et al. 2017
		IDN_KDU_KX642837	D	Herrera et al. 2017
		IDN_KDU_KX642838	D	Herrera et al. 2017
		IDN_KDU_KX642841	D	Herrera et al. 2017
		IDN_KEN_KX642781	D	Herrera et al. 2017
		IDN_KEN_KX642782	D	Herrera et al. 2017
		IDN_KEN_KX642788	D	Herrera et al. 2017
		IDN_KEN_KX642794	D	Herrera et al. 2017
		IDN_KM_KX642751	D	Herrera et al. 2017
		IDN_KM_KX642752	D	Herrera et al. 2017
		IDN_KM_KX642753	D	Herrera et al. 2017
		IDN_KM_KX642755	D	Herrera et al. 2017
		IDN_KM_KX642756	D	Herrera et al. 2017
		IDN_KM_KX642757	D	Herrera et al. 2017
		IDN_KM_KX642761	D	Herrera et al. 2017
		IDN_KM_KX642764	D	Herrera et al. 2017
		IDN_KM_KX642766	D	Herrera et al. 2017
		IDN_KM_KX642768	D	Herrera et al. 2017
		IDN_KM_KX642769	D	Herrera et al. 2017
		IDN_KM_KX642770	D	Herrera et al. 2017
		IDN_KM_KX642771	D	Herrera et al. 2017
		IDN_LAM_KX642853	D	Herrera et al. 2017
		IDN_LAM_KX642856	D	Herrera et al. 2017
		IDN_LAM_KX642857	D	Herrera et al. 2017
		IDN_LAM_KX642858	D	Herrera et al. 2017
		IDN_LAM_KX642859	D	Herrera et al. 2017
		IDN_LAM_KX642860	D	Herrera et al. 2017
		IDN_LAM_KX642861	D	Herrera et al. 2017
		IDN_LAM_KX642862	D	Herrera et al. 2017
		IDN_LAM_KX642863	D	Herrera et al. 2017
		IDN_LAM_KX642865	D	Herrera et al. 2017
		IDN_LAM_KX642866	D	Herrera et al. 2017
		IDN_LOM_KX642871	D	Herrera et al. 2017
		IDN_LOM_KX642872	D	Herrera et al. 2017
		IDN_LOM_KX642874	D	Herrera et al. 2017
		IDN_LOM_KX642875	D	Herrera et al. 2017
		IDN_LOM_KX642877	D	Herrera et al. 2017
		IDN_LOM_KX642878	D	Herrera et al. 2017
		IDN_LOM_KX642879	D	Herrera et al. 2017
		IDN_LOM_KX642883	D	Herrera et al. 2017
		IDN_LOM_KX642887	D	Herrera et al. 2017
		IDN_LOM_KX642888	D	Herrera et al. 2017
		IDN_MDR_KX642898	D	Herrera et al. 2017
		IDN_MDR_KX642901	D	Herrera et al. 2017
		IDN_MDR_KX642902	D	Herrera et al. 2017
		IDN_MDR_KX642903	D	Herrera et al. 2017
		IDN_MDR_KX642904	D	Herrera et al. 2017
		IDN_MDR_KX642905	D	Herrera et al. 2017
		IDN_MED_KX642988	D	Herrera et al. 2017
		IDN_MED_KX642989	D	Herrera et al. 2017
		IDN_MED_KX642993	D	Herrera et al. 2017
		IDN_MED_KX642998	D	Herrera et al. 2017
		IDN_MED_KX643006	D	Herrera et al. 2017
		IDN_MED_KX643007	D	Herrera et al. 2017
		IDN_MED_KX643012	D	Herrera et al. 2017
		IDN_MLK_KX642910	D	Herrera et al. 2017
		IDN_MLK_KX642911	D	Herrera et al. 2017
		IDN_MLK_KX642913	D	Herrera et al. 2017
		IDN_MLK_KX642916	D	Herrera et al. 2017
		IDN_MLK_KX642917	D	Herrera et al. 2017
		IDN_MLK_KX642923	D	Herrera et al. 2017
		IDN_MLK_KX642925	D	Herrera et al. 2017
		IDN_MLK_KX642926	D	Herrera et al. 2017
		IDN_MLK_KX642927	D	Herrera et al. 2017
		IDN_MLK_KX642928	D	Herrera et al. 2017
		IDN_MLK_KX642929	D	Herrera et al. 2017
		IDN_MLK_KX642930	D	Herrera et al. 2017
		IDN_MLK_KX642932	D	Herrera et al. 2017
		IDN_MLK_KX642933	D	Herrera et al. 2017
		IDN_MLK_KX642934	D	Herrera et al. 2017
		IDN_MLK_KX642935	D	Herrera et al. 2017
		IDN_MLK_KX642943	D	Herrera et al. 2017
		IDN_MLK_KX642944	D	Herrera et al. 2017
		IDN_MLK_KX642945	D	Herrera et al. 2017
		IDN_MLK_KX642946	D	Herrera et al. 2017
		IDN_MLK_KX642950	D	Herrera et al. 2017
		IDN_MLK_KX642951	D	Herrera et al. 2017
		IDN_MLK_KX642952	D	Herrera et al. 2017
		IDN_MLK_KX642955	D	Herrera et al. 2017
		IDN_MND_KX642959	D	Herrera et al. 2017
		IDN_MND_KX642960	D	Herrera et al. 2017
		IDN_MND_KX642961	D	Herrera et al. 2017
		IDN_MND_KX642963	D	Herrera et al. 2017
		IDN_MND_KX642965	D	Herrera et al. 2017
		IDN_MND_KX642969	D	Herrera et al. 2017
		IDN_MND_KX642970	D	Herrera et al. 2017
		IDN_MND_KX642971	D	Herrera et al. 2017
		IDN_MND_KX642976	D	Herrera et al. 2017
		IDN_MND_KX642977	D	Herrera et al. 2017
		IDN_MND_KX642978	D	Herrera et al. 2017
		IDN_MND_KX642980	D	Herrera et al. 2017
		IDN_NMR_KX643035	D	Herrera et al. 2017
		IDN_NMR_KX643036	D	Herrera et al. 2017
		IDN_NNU_KX643052	D	Herrera et al. 2017
		IDN_NNU_KX643055	D	Herrera et al. 2017
		IDN_NT_KX642613	D	Herrera et al. 2017
		IDN_NT_KX642615	D	Herrera et al. 2017
		IDN_NT_KX642617	D	Herrera et al. 2017
		IDN_NT_KX642619	D	Herrera et al. 2017
		IDN_NT_KX642620	D	Herrera et al. 2017
		IDN_NT_KX642622	D	Herrera et al. 2017
		IDN_NT_KX642623	D	Herrera et al. 2017
		IDN_NT_KX642624	D	Herrera et al. 2017
		IDN_NT_KX642625	D	Herrera et al. 2017
		IDN_NT_KX642628	D	Herrera et al. 2017
		IDN_NT_KX642631	D	Herrera et al. 2017
		IDN_NT_KX642635	D	Herrera et al. 2017
		IDN_NT_KX642643	D	Herrera et al. 2017
		IDN_NUN_KX643043	D	Herrera et al. 2017
		IDN_NUN_KX643044	D	Herrera et al. 2017
		IDN_POS_KX643091	D	Herrera et al. 2017
		IDN_POS_KX643094	D	Herrera et al. 2017
		IDN_POS_KX643104	D	Herrera et al. 2017
		IDN_POS_KX643105	D	Herrera et al. 2017
		IDN_SBW_KX643141	D	Herrera et al. 2017
		IDN_SBW_KX643144	D	Herrera et al. 2017
		IDN_SBW_KX643149	D	Herrera et al. 2017
		IDN_SBW_KX643150	D	Herrera et al. 2017
		IDN_SBW_KX643151	D	Herrera et al. 2017
		IDN_SBW_KX643152	D	Herrera et al. 2017
		IDN_SBW_KX643154	D	Herrera et al. 2017
		IDN_SBW_KX643156	D	Herrera et al. 2017
		IDN_SBW_KX643157	D	Herrera et al. 2017
		IDN_SBW_KX643158	D	Herrera et al. 2017
		IDN_SBW_KX643166	D	Herrera et al. 2017
		IDN_SBW_KX643175	D	Herrera et al. 2017
		IDN_SBW_KX643181	D	Herrera et al. 2017
		IDN_SBW_KX643185	D	Herrera et al. 2017
		IDN_SBW_KX643188	D	Herrera et al. 2017
		IDN_SBW_KX643190	D	Herrera et al. 2017
		IDN_TAN_KX643212	D	Herrera et al. 2017
		IDN_TAR_KX643229	D	Herrera et al. 2017
		IDN_TAR_KX643232	D	Herrera et al. 2017
		IDN_TAR_KX643233	D	Herrera et al. 2017
		IDN_TAR_KX643234	D	Herrera et al. 2017
		IDN_TAR_KX643235	D	Herrera et al. 2017
		IDN_TAR_KX643237	D	Herrera et al. 2017
		IDN_TAR_KX643238	D	Herrera et al. 2017
		IDN_TAR_KX643240	D	Herrera et al. 2017
		IDN_TAR_KX643241	D	Herrera et al. 2017
		IDN_TAR_KX643242	D	Herrera et al. 2017
		IDN_TAR_KX643245	D	Herrera et al. 2017
		IDN_WS_KX643268	D	Herrera et al. 2017
		IDN_WS_KX643269	D	Herrera et al. 2017
		IDN_WS_KX643270	D	Herrera et al. 2017
		IDN_WS_KX643271	D	Herrera et al. 2017
		IDN_WS_KX643275	D	Herrera et al. 2017
		IDN_WS_KX643277	D	Herrera et al. 2017
		IDN_WS_KX643278	D	Herrera et al. 2017
		IDN_WS_KX643280	D	Herrera et al. 2017
		IDN_WS_KX643282	D	Herrera et al. 2017
		IDN_WS_KX643283	D	Herrera et al. 2017
		IDN_WS_KX643284	D	Herrera et al. 2017
		IDN_WS_KX643287	D	Herrera et al. 2017
		IDN_WS_KX643288	D	Herrera et al. 2017
		IDN_WS_KX643289	D	Herrera et al. 2017
		IDN_WS_KX643290	D	Herrera et al. 2017
		IDN_WS_KX643293	D	Herrera et al. 2017
		IDN_WS_KX643295	D	Herrera et al. 2017
		IDN_WS_KX643297	D	Herrera et al. 2017
		IDN_WS_KX643298	D	Herrera et al. 2017
		IDN_WS_KX643299	D	Herrera et al. 2017
		PHL_ALU_KX642464	D	Herrera et al. 2017
		PHL_ALU_KX642465	D	Herrera et al. 2017
		PHL_CEB_KX642547	D	Herrera et al. 2017
		PHL_LUR_KX642894	D	Herrera et al. 2017
		PHL_MDR_KX643029	D	Herrera et al. 2017
		PHL_PAL_KX643070	D	Herrera et al. 2017
		PHL_SJ_KX643122	D	Herrera et al. 2017
		PHL_SOR_KX643133	D	Herrera et al. 2017
		PHL_TAL_KX643196	D	Herrera et al. 2017
		PHL_TAL_KX643200	D	Herrera et al. 2017
		PHL_ZAM_KX643317	D	Herrera et al. 2017
		PHL_ZAM_KX643318	D	Herrera et al. 2017
		IDN_GOM_KX642664	D	Herrera et al. 2017
		IDN_TAR_KX643221	D	Herrera et al. 2017
		IDN_KM_KX642767	D	Herrera et al. 2017
		IDN_MLK_KX642936	D	Herrera et al. 2017
		IDN_MLK_KX642937	D	Herrera et al. 2017
		IDN_MLK_KX642938	D	Herrera et al. 2017
		IDN_MLK_KX642939	D	Herrera et al. 2017
		IDN_MLK_KX642907	D	Herrera et al. 2017
		LAO_GU448857	D	Miao et al. 2013
		VNM_HM462103	D	Berthouly-Salazar et al. 2010
		BGD_KC260976	D	Bhuiyan et al. 2013
		BGD_KC261057	D	Bhuiyan et al. 2013
		IND_GU448730	D	Miao et al. 2013
		IND_GU448767	D	Miao et al. 2013
		IDN_MLK_KX642942	D	Herrera et al. 2017
		IDN_WS_KX643296	D	Herrera et al. 2017
		IDN_AC_KX642451	D	Herrera et al. 2017
		IDN_BEN_KX642504	D	Herrera et al. 2017
		IDN_KDU_KX642802	D	Herrera et al. 2017
		IDN_KDU_KX642835	D	Herrera et al. 2017
		IDN_KEN_KX642785	D	Herrera et al. 2017
		IDN_MND_KX642966	D	Herrera et al. 2017
		IDN_NT_KX642604	D	Herrera et al. 2017
		IDN_NT_KX642611	D	Herrera et al. 2017
		IDN_NT_KX642616	D	Herrera et al. 2017
		IDN_NT_KX642618	D	Herrera et al. 2017
Hap_175	1	IDN_AC_KX642445	D	Herrera et al. 2017
Hap_176	1	PHL_TUG_KX643246	D	Herrera et al. 2017
Hap_177	4	IDN_GOM_KX642675	D	Herrera et al. 2017
		IDN_MND_KX642964	D	Herrera et al. 2017
		PHL_COT_KX642590	D	Herrera et al. 2017
		PHL_COT_KX642591	D	Herrera et al. 2017
Hap_178	1	IDN_KEN_KX642786	D	Herrera et al. 2017
Hap_179	1	IDN_LOM_KX642876	D	Herrera et al. 2017
Hap_180	1	IDN_LOM_KX642882	D	Herrera et al. 2017
Hap_181	3	IDN_NUN_KX643045	D	Herrera et al. 2017
		IDN_NUN_KX643046	D	Herrera et al. 2017
		IDN_NUN_KX643047	D	Herrera et al. 2017
Hap_182	5	IDN_CIA_KX642578	D	Herrera et al. 2017
		IDN_MED_KX643002	D	Herrera et al. 2017
		IDN_POS_KX643101	D	Herrera et al. 2017
		IDN_SBW_KX643143	D	Herrera et al. 2017
		IDN_SBW_KX643147	D	Herrera et al. 2017
Hap_183	2	EUR_AY704704	D	Liu et al. 2006
		IND_AY704704	D	Liu et al. 2006
Hap_184	3	IDN_TAN_KX643211	E	Herrera et al. 2017
		IDN_TAN_KX643214	E	Herrera et al. 2017
		IDN_TAN_KX643216	E	Herrera et al. 2017
Hap_185	1	IND_EU847816	E	Kanginakudru et al. 2008
Hap_186	2	IND_AY644973	E	Liu et al. 2006
		IND_GU447581	E	Miao et al. 2013
Hap_187	12	CHN_AF128325_Zhejiang	E	Fu et al. 1999; GenBank
		CHN_AF128326_Zhejiang	E	Fu et al. 1999; GenBank
		CHN_AF128327_Zhejiang	E	Fu et al. 1999; GenBank
		CHN_AF128328_Zhejiang	E	Fu et al. 1999; GenBank
		CHN_AF128329_Zhejiang	E	Fu et al. 1999; GenBank
		CHN_AF512126_Guizhou	E	Liu et al. 2006
		CHN_AF512271_Sichuan	E	Liu et al. 2006
		CHN_GU261694_Hebei	E	Miao et al. 2013
		CHL_EF190850	E	Gongora et al. 2008
		CHL_VIL_2	E	This study	MN149722
		IDN_TAN_KX643210	E	Herrera et al. 2017
		BGD_KC261042	E	Bhuiyan et al. 2013
Hap_188	4	CHN_AF512141_Hennan	E	Liu et al. 2006
		CHN_AF512142_Hennan	E	Liu et al. 2006
		CHN_AF512144_Hennan	E	Liu et al. 2006
		CHN_AF512230_Jiangsu	E	Liu et al. 2006
Hap_189	1	IDN_NUN_KX643041	E	Herrera et al. 2017
Hap_190	4	IDN_KDU_KX642807	E	Herrera et al. 2017
		IDN_AC_KX642436	E	Herrera et al. 2017
		IDN_GOM_KX642668	E	Herrera et al. 2017
		IDN_TAN_KX643220	E	Herrera et al. 2017
Hap_191	1	IDN_LOM_KX642881	D	Herrera et al. 2017
Hap_192	1	BGD_KC261063	D	Bhuiyan et al. 2013
Hap_193	5	PHL_LN_KX642867	D	Herrera et al. 2017
		PHL_LUR_KX642893	D	Herrera et al. 2017
		PHL_SAM_KX643110	D	Herrera et al. 2017
		PHL_ZAM_KX643325	D	Herrera et al. 2017
		PHL_ZAM_KX643328	D	Herrera et al. 2017
Hap_194	2	IDN_GOM_KX642671	D	Herrera et al. 2017
		PHL_TUG_KX643251	D	Herrera et al. 2017
Hap_195	3	IDN_NT_KX642632	D	Herrera et al. 2017
		IDN_NT_KX642633	D	Herrera et al. 2017
		IDN_NT_KX642636	D	Herrera et al. 2017
Hap_196	4	IDN_KDU_KX642810	D	Herrera et al. 2017
		IDN_KDU_KX642818	D	Herrera et al. 2017
		IDN_KDU_KX642839	D	Herrera et al. 2017
		IDN_LAM_KX642851	D	Herrera et al. 2017
Hap_197	1	IDN_TAR_KX643243	D	Herrera et al. 2017
Hap_198	3	PHL_ZAM_KX643319	D	Herrera et al. 2017
		PHL_ZAM_KX643326	D	Herrera et al. 2017
		PHL_ZAM_KX643330	D	Herrera et al. 2017
Hap_199	1	IDN_MED_KX642996	D	Herrera et al. 2017
Hap_200	2	PHL_MDR_KX643021	D	Herrera et al. 2017
		PHL_MDR_KX643030	D	Herrera et al. 2017
Hap_201	3	IDN_BEN_KX642499	D	Herrera et al. 2017
		IDN_BEN_KX642512	D	Herrera et al. 2017
		IDN_KDU_KX642808	D	Herrera et al. 2017
Hap_202	2	IDN_JT_KX642739	D	Herrera et al. 2017
		IDN_JT_KX642742	D	Herrera et al. 2017
Hap_203	4	IDN_GAR_KX642648	D	Herrera et al. 2017
		IDN_GAR_KX642652	D	Herrera et al. 2017
		IDN_JT_KX642738	D	Herrera et al. 2017
		IDN_NT_KX642610	D	Herrera et al. 2017
Hap_204	1	IDN_TAN_KX643205	D	Herrera et al. 2017
Hap_205	2	IDN_MND_KX642979	D	Herrera et al. 2017
		IDN_MND_KX642968	D	Herrera et al. 2017
Hap_206	1	IDN_GOM_KX642667	D	Herrera et al. 2017
Hap_207	4	IDN_GAR_KX642656	D	Herrera et al. 2017
		IDN_GAR_KX642659	D	Herrera et al. 2017
		IDN_SBW_KX643153	D	Herrera et al. 2017
		PHL_IFU_KX642698	D	Herrera et al. 2017
Hap_208	2	IDN_GAR_KX642657	D	Herrera et al. 2017
		IDN_JAT_KX642722	D	Herrera et al. 2017
Hap_209	2	IDN_MLK_KX642947	D	Herrera et al. 2017
		IDN_MLK_KX642954	D	Herrera et al. 2017
Hap_210	1	IDN_BAN_KX642485	D	Herrera et al. 2017
Hap_211	3	IDN_POS_KX643102	D	Herrera et al. 2017
		IDN_POS_KX643106	D	Herrera et al. 2017
		IDN_POS_KX643107	D	Herrera et al. 2017
Hap_212	119	IDN_CIS_KX642557	D	Herrera et al. 2017
		IDN_JT_KX642741	D	Herrera et al. 2017
		IDN_KM_KX642748	D	Herrera et al. 2017
		IDN_KM_KX642754	D	Herrera et al. 2017
		IDN_LAM_KX642852	D	Herrera et al. 2017
		IDN_SBW_KX643184	D	Herrera et al. 2017
		IDN_AC_KX642438	D	Herrera et al. 2017
		IDN_BAN_KX642473	D	Herrera et al. 2017
		IDN_BAN_KX642474	D	Herrera et al. 2017
		IDN_BAN_KX642475	D	Herrera et al. 2017
		IDN_BAN_KX642476	D	Herrera et al. 2017
		IDN_BAN_KX642477	D	Herrera et al. 2017
		IDN_BAN_KX642478	D	Herrera et al. 2017
		IDN_BEN_KX642505	D	Herrera et al. 2017
		IDN_BEN_KX642506	D	Herrera et al. 2017
		IDN_BEN_KX642507	D	Herrera et al. 2017
		IDN_BEN_KX642508	D	Herrera et al. 2017
		IDN_BEN_KX642510	D	Herrera et al. 2017
		IDN_BEN_KX642511	D	Herrera et al. 2017
		IDN_CIR_KX642566	D	Herrera et al. 2017
		IDN_CIR_KX642567	D	Herrera et al. 2017
		IDN_CIR_KX642568	D	Herrera et al. 2017
		IDN_CIR_KX642570	D	Herrera et al. 2017
		IDN_CIR_KX642572	D	Herrera et al. 2017
		IDN_CIS_KX642550	D	Herrera et al. 2017
		IDN_CIS_KX642559	D	Herrera et al. 2017
		IDN_GAR_KX642654	D	Herrera et al. 2017
		IDN_GAR_KX642655	D	Herrera et al. 2017
		IDN_GOM_KX642670	D	Herrera et al. 2017
		IDN_JAT_KX642723	D	Herrera et al. 2017
		IDN_JAT_KX642725	D	Herrera et al. 2017
		IDN_JT_KX642734	D	Herrera et al. 2017
		IDN_JT_KX642736	D	Herrera et al. 2017
		IDN_JT_KX642740	D	Herrera et al. 2017
		IDN_KDU_KX642797	D	Herrera et al. 2017
		IDN_KDU_KX642804	D	Herrera et al. 2017
		IDN_KDU_KX642805	D	Herrera et al. 2017
		IDN_KDU_KX642806	D	Herrera et al. 2017
		IDN_KDU_KX642811	D	Herrera et al. 2017
		IDN_KDU_KX642822	D	Herrera et al. 2017
		IDN_KDU_KX642824	D	Herrera et al. 2017
		IDN_KDU_KX642825	D	Herrera et al. 2017
		IDN_KDU_KX642826	D	Herrera et al. 2017
		IDN_KDU_KX642827	D	Herrera et al. 2017
		IDN_KDU_KX642834	D	Herrera et al. 2017
		IDN_KDU_KX642836	D	Herrera et al. 2017
		IDN_KDU_KX642840	D	Herrera et al. 2017
		IDN_KDU_KX642842	D	Herrera et al. 2017
		IDN_KDU_KX642843	D	Herrera et al. 2017
		IDN_KDU_KX642845	D	Herrera et al. 2017
		IDN_KEN_KX642793	D	Herrera et al. 2017
		IDN_KM_KX642749	D	Herrera et al. 2017
		IDN_KM_KX642750	D	Herrera et al. 2017
		IDN_KM_KX642760	D	Herrera et al. 2017
		IDN_KM_KX642762	D	Herrera et al. 2017
		IDN_KM_KX642763	D	Herrera et al. 2017
		IDN_LAM_KX642864	D	Herrera et al. 2017
		IDN_LOM_KX642886	D	Herrera et al. 2017
		IDN_MDR_KX642897	D	Herrera et al. 2017
		IDN_MDR_KX642900	D	Herrera et al. 2017
		IDN_MLK_KX642909	D	Herrera et al. 2017
		IDN_MLK_KX642912	D	Herrera et al. 2017
		IDN_MLK_KX642919	D	Herrera et al. 2017
		IDN_MLK_KX642920	D	Herrera et al. 2017
		IDN_MLK_KX642921	D	Herrera et al. 2017
		IDN_MLK_KX642922	D	Herrera et al. 2017
		IDN_MLK_KX642924	D	Herrera et al. 2017
		IDN_MLK_KX642931	D	Herrera et al. 2017
		IDN_MLK_KX642949	D	Herrera et al. 2017
		IDN_MLK_KX642953	D	Herrera et al. 2017
		IDN_MND_KX642962	D	Herrera et al. 2017
		IDN_MND_KX642972	D	Herrera et al. 2017
		IDN_MND_KX642973	D	Herrera et al. 2017
		IDN_MND_KX642974	D	Herrera et al. 2017
		IDN_NT_KX642638	D	Herrera et al. 2017
		IDN_NT_KX642639	D	Herrera et al. 2017
		IDN_POS_KX643096	D	Herrera et al. 2017
		IDN_POS_KX643097	D	Herrera et al. 2017
		IDN_SBW_KX643142	D	Herrera et al. 2017
		IDN_SBW_KX643171	D	Herrera et al. 2017
		IDN_SBW_KX643177	D	Herrera et al. 2017
		IDN_SBW_KX643178	D	Herrera et al. 2017
		IDN_SBW_KX643179	D	Herrera et al. 2017
		IDN_SBW_KX643183	D	Herrera et al. 2017
		IDN_SBW_KX643186	D	Herrera et al. 2017
		IDN_SBW_KX643187	D	Herrera et al. 2017
		IDN_SBW_KX643189	D	Herrera et al. 2017
		IDN_TAN_KX643213	D	Herrera et al. 2017
		IDN_TAN_KX643217	D	Herrera et al. 2017
		IDN_TAN_KX643218	D	Herrera et al. 2017
		IDN_TAN_KX643219	D	Herrera et al. 2017
		IDN_TAR_KX643224	D	Herrera et al. 2017
		IDN_TAR_KX643226	D	Herrera et al. 2017
		IDN_TAR_KX643228	D	Herrera et al. 2017
		IDN_WS_KX643281	D	Herrera et al. 2017
		IDN_WS_KX643300	D	Herrera et al. 2017
		IDN_WS_KX643302	D	Herrera et al. 2017
		IDN_YOG_KX643303	D	Herrera et al. 2017
		IDN_YOG_KX643304	D	Herrera et al. 2017
		IDN_YOG_KX643305	D	Herrera et al. 2017
		IDN_YOG_KX643307	D	Herrera et al. 2017
		IDN_YOG_KX643309	D	Herrera et al. 2017
		IDN_YOG_KX643310	D	Herrera et al. 2017
		IDN_YOG_KX643311	D	Herrera et al. 2017
		IDN_YOG_KX643312	D	Herrera et al. 2017
		IDN_YOG_KX643313	D	Herrera et al. 2017
		IDN_YOG_KX643314	D	Herrera et al. 2017
		IDN_YOG_KX643315	D	Herrera et al. 2017
		PHL_BTN_KX642490	D	Herrera et al. 2017
		PHL_BTN_KX642491	D	Herrera et al. 2017
		PHL_IFU_KX642695	D	Herrera et al. 2017
		PHL_LUR_KX642891	D	Herrera et al. 2017
		PHL_MTC_KX642986	D	Herrera et al. 2017
		PHL_PAL_KX643088	D	Herrera et al. 2017
		PHL_PAL_KX643089	D	Herrera et al. 2017
		IDN_YOG_KX643306	D	Herrera et al. 2017
		IDN_KDU_KX642844	D	Herrera et al. 2017
		IDN_MDR_KX642899	D	Herrera et al. 2017
		IDN_NT_KX642600	D	Herrera et al. 2017
Hap_213	1	IDN_AC_KX642452	D	Herrera et al. 2017
Hap_214	1	IDN_MED_KX642997	D	Herrera et al. 2017
Hap_215	3	IDN_WS_KX643267	D	Herrera et al. 2017
		IDN_AC_KX642442	D	Herrera et al. 2017
		IDN_AC_KX642459	D	Herrera et al. 2017
Hap_216	10	IDN_NNU_KX643057	D	Herrera et al. 2017
		IDN_TAR_KX643222	D	Herrera et al. 2017
		IDN_TAR_KX643223	D	Herrera et al. 2017
		PHL_ASI_KX642466	D	Herrera et al. 2017
		PHL_ASI_KX642467	D	Herrera et al. 2017
		PHL_BUT_KX642531	D	Herrera et al. 2017
		PHL_DAM_KX642593	D	Herrera et al. 2017
		PHL_PAL_KX643090	D	Herrera et al. 2017
		PHL_SOR_KX643134	D	Herrera et al. 2017
		PHL_ZAM_KX643333	D	Herrera et al. 2017
Hap_217	16	LAO_GU261682	D	Miao et al. 2013
		LAO_GU448859	D	Miao et al. 2013
		LAO_GU448860	D	Miao et al. 2013
		CHN_AY588637_Fujian	D	Qu et al. 2004; GenBank
		CHN_AY588638_Fujian	D	Qu et al. 2004; GenBank
		CHN_AY588639_Fujian	D	Qu et al. 2004; GenBank
		CHN_AY588640_Fujian	D	Qu et al. 2004; GenBank
		CHN_AY588641_Fujian	D	Qu et al. 2004; GenBank
		CHN_AY588642_Fujian	D	Qu et al. 2004; GenBank
		IDN_TAR_KX643236	D	Herrera et al. 2017
		PHL_DO_KX642595	D	Herrera et al. 2017
		PHL_PAL_KX643078	D	Herrera et al. 2017
		PHL_PAL_KX643084	D	Herrera et al. 2017
		PHL_PAL_KX643085	D	Herrera et al. 2017
		PHL_PAL_KX643087	D	Herrera et al. 2017
		VNM_KX643136	D	Herrera et al. 2017
Hap_218	3	BGD_KC261024	D	Bhuiyan et al. 2013
		IND_GU261685	D	Miao et al. 2013
		IND_GU448475	D	Miao et al. 2013
Hap_219	15	IND_GU448400	D	Miao et al. 2013
		IND_GU448480	D	Miao et al. 2013
		BGD_KC260982	D	Bhuiyan et al. 2013
		BGD_KC260983	D	Bhuiyan et al. 2013
		BGD_KC260984	D	Bhuiyan et al. 2013
		BGD_KC260985	D	Bhuiyan et al. 2013
		BGD_KC260986	D	Bhuiyan et al. 2013
		BGD_KC260998	D	Bhuiyan et al. 2013
		BGD_KC261002	D	Bhuiyan et al. 2013
		BGD_KC261021	D	Bhuiyan et al. 2013
		BGD_KC261022	D	Bhuiyan et al. 2013
		BGD_KC261023	D	Bhuiyan et al. 2013
		BGD_KC261045	D	Bhuiyan et al. 2013
		BGD_KC261066	D	Bhuiyan et al. 2013
		BGD_KC261067	D	Bhuiyan et al. 2013
Hap_220	2	IDN_TAR_KX643231	D	Herrera et al. 2017
		IDN_TAR_KX643230	D	Herrera et al. 2017
Hap_221	1	IDN_BEN_KX642502	D	Herrera et al. 2017
Hap_222	1	IDN_NNU_KX643054	D	Herrera et al. 2017
Hap_223	1	PHL_INT_KX642712	D	Herrera et al. 2017
Hap_224	2	PHL_MTC_KX642982	D	Herrera et al. 2017
		PHL_MTC_KX642983	D	Herrera et al. 2017
Hap_225	1	THA_AB009441	D	Miyake et al. 1997, GenBank
Hap_226	24	PHL_CEB_KX642549	D	Herrera et al. 2017
		PHL_AYA_KX642470	D	Herrera et al. 2017
		PHL_BUK_KX642523	D	Herrera et al. 2017
		PHL_BUK_KX642524	D	Herrera et al. 2017
		PHL_BUK_KX642525	D	Herrera et al. 2017
		PHL_BUT_KX642526	D	Herrera et al. 2017
		PHL_CAM_KX642539	D	Herrera et al. 2017
		PHL_COT_KX642587	D	Herrera et al. 2017
		PHL_CV_KX642534	D	Herrera et al. 2017
		PHL_CV_KX642535	D	Herrera et al. 2017
		PHL_CV_KX642536	D	Herrera et al. 2017
		PHL_CV_KX642537	D	Herrera et al. 2017
		PHL_CV_KX642538	D	Herrera et al. 2017
		PHL_ILO_KX642707	D	Herrera et al. 2017
		PHL_KIB_KX642848	D	Herrera et al. 2017
		PHL_PAL_KX643061	D	Herrera et al. 2017
		PHL_PAL_KX643079	D	Herrera et al. 2017
		PHL_PAL_KX643081	D	Herrera et al. 2017
		PHL_SAM_KX643109	D	Herrera et al. 2017
		PHL_SAM_KX643116	D	Herrera et al. 2017
		PHL_SJ_KX643121	D	Herrera et al. 2017
		PHL_TAL_KX643194	D	Herrera et al. 2017
		PHL_TUG_KX643250	D	Herrera et al. 2017
		PHL_VAL_KX643254	D	Herrera et al. 2017
Hap_227	1	PHL_KAL_KX642775	D	Herrera et al. 2017
Hap_228	2	IDN_KEN_KX642787	D	Herrera et al. 2017
		IDN_MLK_KX642906	D	Herrera et al. 2017
Hap_229	1	IDN_AC_KX642443	D	Herrera et al. 2017
Hap_230	9	PHL_DO_KX642597	D	Herrera et al. 2017
		PHL_PAL_KX643058	D	Herrera et al. 2017
		PHL_PAL_KX643062	D	Herrera et al. 2017
		PHL_PAL_KX643063	D	Herrera et al. 2017
		PHL_PAL_KX643064	D	Herrera et al. 2017
		PHL_PAL_KX643065	D	Herrera et al. 2017
		PHL_PAL_KX643066	D	Herrera et al. 2017
		PHL_PAL_KX643067	D	Herrera et al. 2017
		PHL_PAL_KX643068	D	Herrera et al. 2017
Hap_231	5	IDN_NT_KX642607	D	Herrera et al. 2017
		IDN_GOM_KX642662	D	Herrera et al. 2017
		IDN_GOM_KX642672	D	Herrera et al. 2017
		IDN_NT_KX642612	D	Herrera et al. 2017
		IDN_KM_KX642759	D	Herrera et al. 2017
Hap_232	2	PHL_MDR_KX643027	D	Herrera et al. 2017
		PHL_ZAM_KX643324	D	Herrera et al. 2017
Hap_233	1	IDN_CIA_KX642585	D	Herrera et al. 2017
Hap_234	1	IDN_LAM_KX642855	D	Herrera et al. 2017
Hap_235	1	IDN_KDU_KX642833	D	Herrera et al. 2017
Hap_236	1	IDN_MED_KX643013	D	Herrera et al. 2017
Hap_237	4	PHL_MDR_KX643019	D	Herrera et al. 2017
		PHL_MDR_KX643022	D	Herrera et al. 2017
		PHL_MDR_KX643032	D	Herrera et al. 2017
		PHL_PAL_KX643083	D	Herrera et al. 2017
Hap_238	2	PHL_IFU_KX642685	D	Herrera et al. 2017
		PHL_ISA_KX642720	D	Herrera et al. 2017
Hap_239	1	PHL_MDR_KX643015	D	Herrera et al. 2017
Hap_240	1	PHL_PAL_KX643059	D	Herrera et al. 2017
Hap_241	1	IDN_NT_KX642626	D	Herrera et al. 2017
Hap_242	6	IDN_BAN_KX642481	D	Herrera et al. 2017
		IDN_KDU_KX642796	D	Herrera et al. 2017
		IDN_KDU_KX642828	D	Herrera et al. 2017
		IDN_KM_KX642765	D	Herrera et al. 2017
		IDN_SBW_KX643145	D	Herrera et al. 2017
		PHL_IFU_KX642694	D	Herrera et al. 2017
Hap_243	2	PHL_CV_KX642533	D	Herrera et al. 2017
		PHL_MDR_KX643016	D	Herrera et al. 2017
Hap_244	2	IDN_KDU_KX642800	D	Herrera et al. 2017
		IDN_KDU_KX642799	D	Herrera et al. 2017
Hap_245	1	PHL_BUK_KX642522	D	Herrera et al. 2017
Hap_246	2	IDN_WS_KX643286	D	Herrera et al. 2017
		PHL_ZAM_KX643327	D	Herrera et al. 2017
Hap_247	2	IDN_LOM_KX642885	D	Herrera et al. 2017
		IDN_NT_KX642637	D	Herrera et al. 2017
Hap_248	1	IDN_POS_KX643103	D	Herrera et al. 2017
Hap_249	5	IDN_BAN_KX642482	D	Herrera et al. 2017
		IDN_POS_KX643092	D	Herrera et al. 2017
		IDN_POS_KX643093	D	Herrera et al. 2017
		IDN_POS_KX643095	D	Herrera et al. 2017
		IDN_WS_KX643301	D	Herrera et al. 2017
Hap_250	37	PHL_IFU_KX642696	D	Herrera et al. 2017
		VUT_KX643261	D	Herrera et al. 2017
		CHL_EasterIs_KU508861	D	Luzuriaga-Neira 2017
		CHL_EasterIs_KU508862	D	Luzuriaga-Neira 2017
		CHL_EasterIs_KU508863	D	Luzuriaga-Neira 2017
		CHL_EasterIs_KU508865	D	Luzuriaga-Neira 2017
		PHL_ASI_KX642469	D	Herrera et al. 2017
		PHL_BAT_KX642492	D	Herrera et al. 2017
		PHL_BAT_KX642493	D	Herrera et al. 2017
		PHL_BAT_KX642494	D	Herrera et al. 2017
		PHL_BAT_KX642495	D	Herrera et al. 2017
		PHL_IFU_KX642683	D	Herrera et al. 2017
		PHL_IFU_KX642684	D	Herrera et al. 2017
[truncated: 848 more rows]
